# Supplementary material for: Analysis of Daily Ambient Temperature and Firearm Violence in 100 US Cities
Source: PubMed Central journal article supplement (PMC9856408; doi:10.1001/jamanetworkopen.2022.47207), 2022-12-16

## Supplemental Online Content

Lyons VH, Gause EL, Spangler KR, Wellenius GA, Jay J. Analysis of daily ambient temperature and firearm violence in 100 US cities. *JAMA Netw Open*. 2022;5(12):e2247207.  
doi:10.1001/jamanetworkopen.2022.47207

### **eAppendix.** Supplemental Methods

#### **eReferences**

**eFigure 1.** Graph of Daily Firearm Incidents Across the 100 Cities for the Study Period from 2015-2020 Showing Seasonal Trends

**eFigure 2.** Pooled Lagged Relationship Between Firearm Incidents and Temperature Over 7 Days Across 100 US Cities

**eFigure 3.** Sensitivity Analysis Changing the Placement and Number of Knots Within the Maximum Daily Temperature and Firearm Incident Relationship, Specified With a 0-Day Lag and Pooled Across 100 US Cities

**eFigure 4.** Sensitivity Analysis Changing the Placement and Number of Knots Within the Maximum Daily Temperature and Firearm Incident Relationship, Specified With a 2-Day Lag and Pooled Across 100 US Cities

**eFigure 5.** Sensitivity Analysis Assessing the Pooled Firearm Incident and Temperature Association Using Different Numbers of Lag Days, Across 100 US Cities

**eFigure 6.** Results of the Overall Heat and Firearm Incident Association in the Sensitivity Analyses Accounting for the 2020 Pandemic Period

**eTable 1.** Sensitivity Analyses Assessing the Excess Risk of Firearm Incidents on Hot Days Using Different Numbers of Lag Days

**eTable 2.** Analysis City Characteristics and Attributable Heat Estimates From the Zero-Lag Model

**eFigure 7.** 100 City-Specific Result Graphs

This supplemental material has been provided by the authors to give readers additional information about their work.

## eAppendix. Supplemental Methods

### Notes on analysis, data, and computation:

All analyses were performed in R Version 4.0.5<sup>1</sup> using the following packages: dlnm,<sup>2</sup> mvmeta,<sup>3</sup> tsModel,<sup>4</sup> and splines.<sup>1</sup>

The code used in the primary analysis can be found on GitHub: [https://github.com/Epi-Emma/2022\\_temperature\\_and\\_firearm\\_violence.git](https://github.com/Epi-Emma/2022_temperature_and_firearm_violence.git)

This analysis benefited from the R code examples written by Antonio Gasparrini and made available on his personal website (<http://www.ag-myresearch.com/>):

- Example of a DLNM analysis across multiple locations:  
[https://github.com/gasparrini/2015\\_gasparrini\\_Lancet\\_Rcodedata](https://github.com/gasparrini/2015_gasparrini_Lancet_Rcodedata)
- Investigating the lagged relationship:  
[https://github.com/gasparrini/2016\\_gasparrini\\_AJE\\_Rcodedata](https://github.com/gasparrini/2016_gasparrini_AJE_Rcodedata)
- Attributable risk calculations and plots:  
[https://github.com/gasparrini/2014\\_gasparrini\\_BMCMrm\\_Rcodedata](https://github.com/gasparrini/2014_gasparrini_BMCMrm_Rcodedata)

US Census Bureau administrative “places” shapefiles were used to define the geographic boundaries for each of the 100 analysis cities.<sup>5</sup> We used population estimates derived from the Global Human Settlements Population (GHS-POP) 2015 dataset for the population weighting of the city-specific maximum daily temperatures from the North American Land Data Assimilation System Phase 2\_(NLDAS-2).<sup>6-8</sup>

### eReferences

1. R Core Team (2021). R: A language and environment for statistical computing. R Foundation for Statistical Computing, Vienna, Austria. URL <https://www.R-project.org/>.
2. Gasparrini A. Distributed lag linear and non-linear models in R: the package dlnm. *Journal of Statistical Software*. 2011; 43(8):1-20. <https://doi.org/10.18637/jss.v043.i08>
3. Gasparrini A., Armstrong, B., Kenward M. G. (2012). Multivariate meta-analysis for non-linear and other multi-parameter associations. *Statistics in Medicine*. 31(29):3821-3839.
4. Roger D. Peng and with contributions from Aidan McDermott (2022). tsModel: Time Series Modeling for Air Pollution and Health. R package version 0.6-1. <https://CRAN.R-project.org/package=tsModel>
5. US Census Bureau. “Cartographic Boundary Files - Shapefile.” Accessed November 11, 2021. <https://www.census.gov/geographies/mapping-files/time-series/geo/carto-boundary-file.2010.html>

6. Schiavina M, Freire S, MacManus K. GHS-POP R2019A - GHS population grid multitemporal (1975-1990-2000-2015) [Internet]. Jt. Res. Centre, Eur. Comm. 2019; Available from: <https://data.europa.eu/euodp/en/data/dataset/0c6b9751-a71f-4062-830b-43c9f432370f>
7. Xia, Y., et al., NCEP/EMC (2009), NLDAS Primary Forcing Data L4 Hourly 0.125 x 0.125 degree V002, Edited by David Mocko, NASA/GSFC/HSL, Greenbelt, Maryland, USA, Goddard Earth Sciences Data and Information Services Center (GES DISC), Accessed: March 1, 2020, DOI: 10.5067/6J5LHHOHZHN4
8. Xia, Y., K. Mitchell, M. Ek, J. Sheffield, B. Cosgrove, E. Wood, L. Luo, C. Alonge, H. Wei, J. Meng, B. Livneh, D. Lettenmaier, V. Koren, Q. Duan, K. Mo, Y. Fan, and D. Mocko (2012). Continental-scale water and energy flux analysis and validation for the North American Land Data Assimilation System project phase 2 (NLDAS-2): 1. Intercomparison and application of model products. *J. Geophys. Res.*, 117, D03109, doi:10.1029/2011JD016048

**eFigure 1: Graph of Daily Firearm Incidents Across the 100 Cities for the Study Period from 2015-2020 Showing Seasonal Trends**

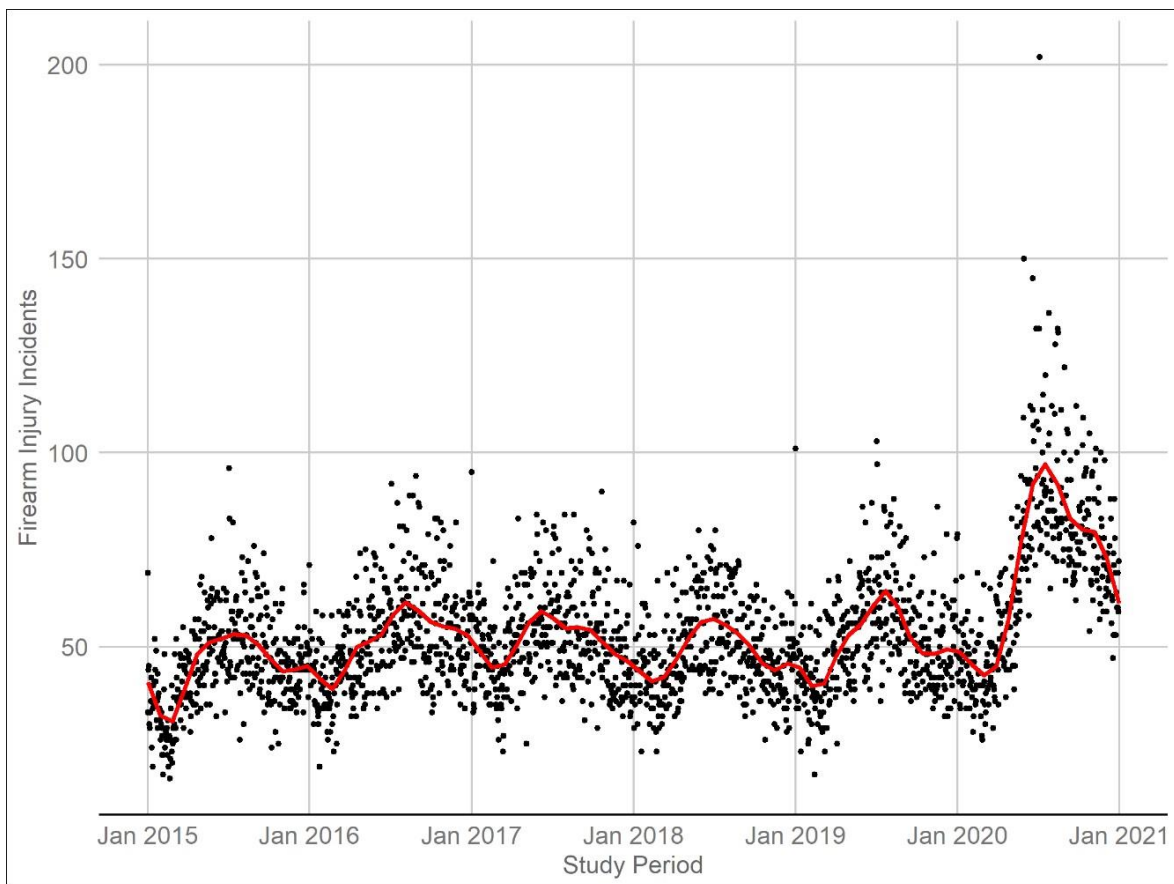

Note: This figure plots the daily count of firearm incidents among the 100 analysis cities throughout the study period from 2015 through 2020. Daily firearm incident counts range from 16 to 202 per day (the high outlier of 202 firearm incidents occurred on July 5<sup>th</sup>, 2020). The red line is represents our method for controlling for seasonality: cubic splines with 7 knots per study year for a total of 42 knots). In the primary analyses, adjustment for seasonal trends was city-specific before results were pooled across cities, so this graph is just an example of what the seasonal trends would look like using all cities' data.

**eFigure 2: Pooled Lagged Relationship Between Firearm Incidents and Temperature Over 7 Days Across 100 US Cities**

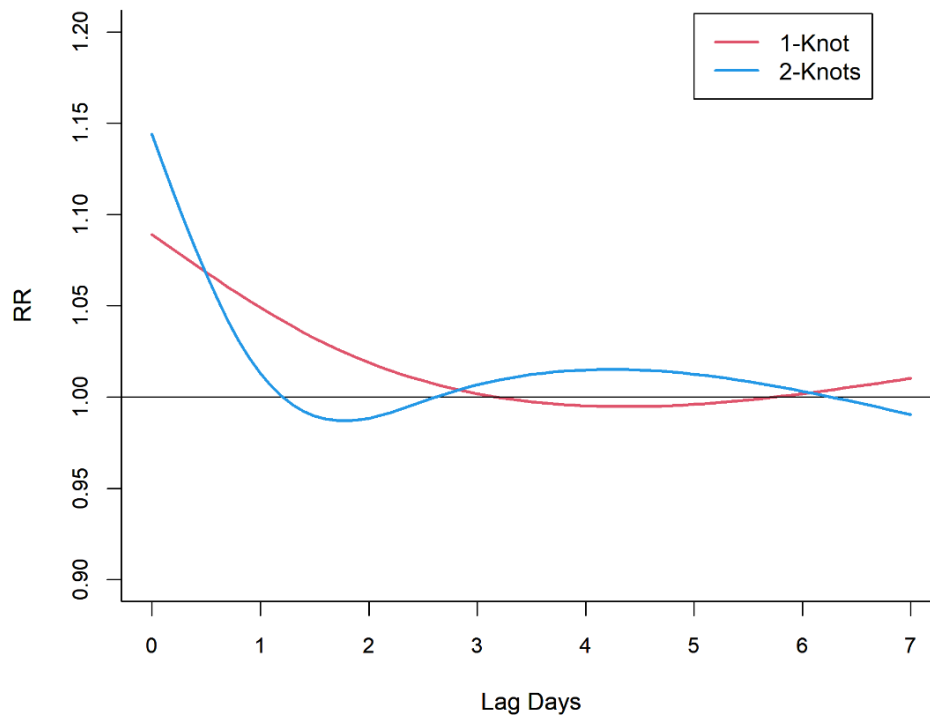

NOTE: This graph displays the overall pooled lagged function comparing the risk of firearm incidents at the 95th temperature percentile compared to the median temperature from a DLNM model fit with up to seven days of lag across 100 cities. The DLNM models were fit with knots at the 10<sup>th</sup>, 75<sup>th</sup>, and 90<sup>th</sup> percentiles for the exposure~outcome association. A sensitivity analysis was conducted using both one and two inner knots within the lag~outcome association to allow greater flexibility in the lagged relationship. The influence of heat on firearm incidents was strongest on the day of, which prompted the authors to choose a zero-lag model for the primary analysis.

**eFigure 3: Sensitivity Analysis Changing the Placement and Number of Knots Within the Maximum Daily Temperature and Firearm Incident Relationship, Specified With a 0-Day Lag and Pooled Across 100 US Cities**

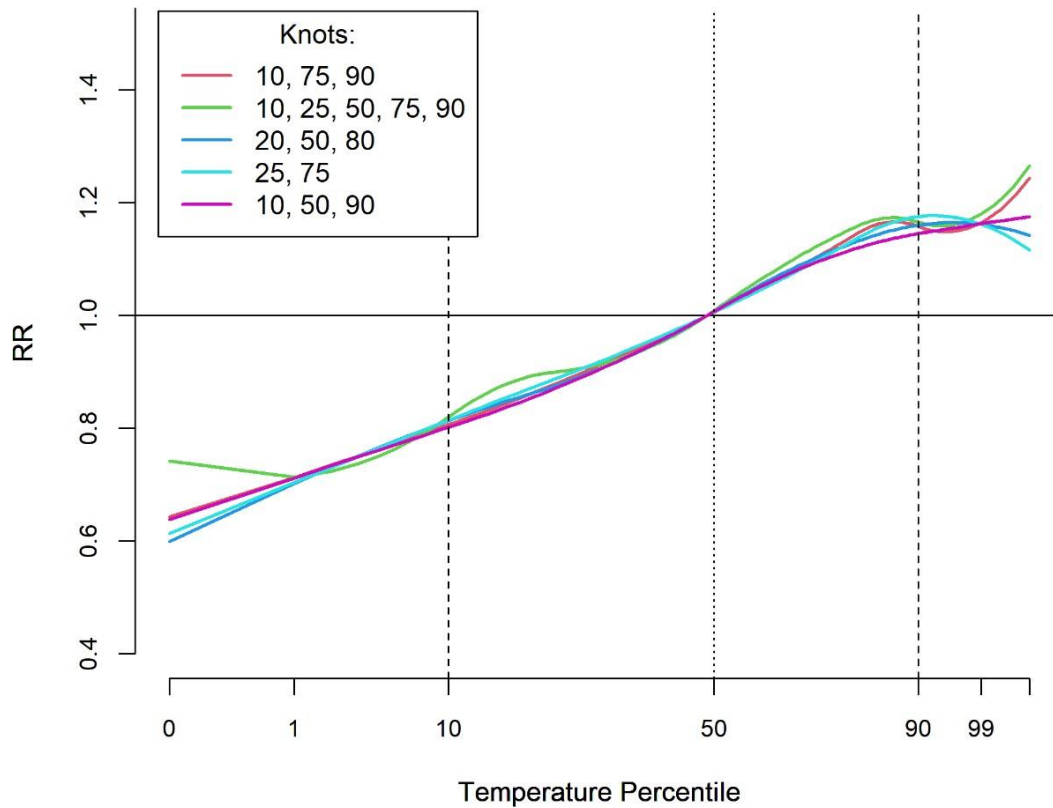

Note: This graph depicts the overall pooled association between daily maximum temperature and firearm incidents across 100 cities, with different combinations of the number and placement of knots specified for the exposure~outcome association to assess whether the relationship was robust to model specification. The DLNM models were fit with a 0-day lag period.

**eFigure 4: Sensitivity Analysis Changing the Placement and Number of Knots Within the Maximum Daily Temperature and Firearm Incident Relationship, Specified With a 2-Day Lag and Pooled Across 100 US Cities**

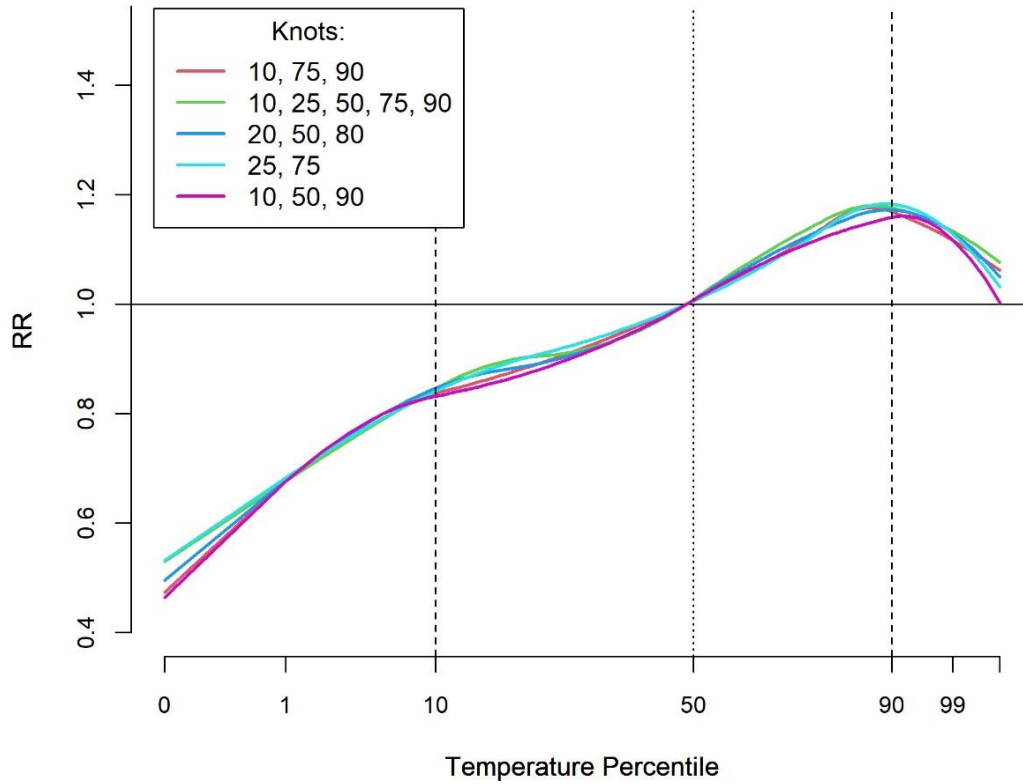

Note: This graph depicts the overall pooled association between daily maximum temperature and firearm incidents across 100 cities, with different combinations of the number and placement of knots specified for the exposure~outcome association to assess whether the relationship was robust to model specification. The DLNM models were fit with a 2-day lag period.

**eFigure 5: Sensitivity Analysis Assessing the Pooled Firearm Incident and Temperature Association Using Different Numbers of Lag Days, Across 100 US Cities**

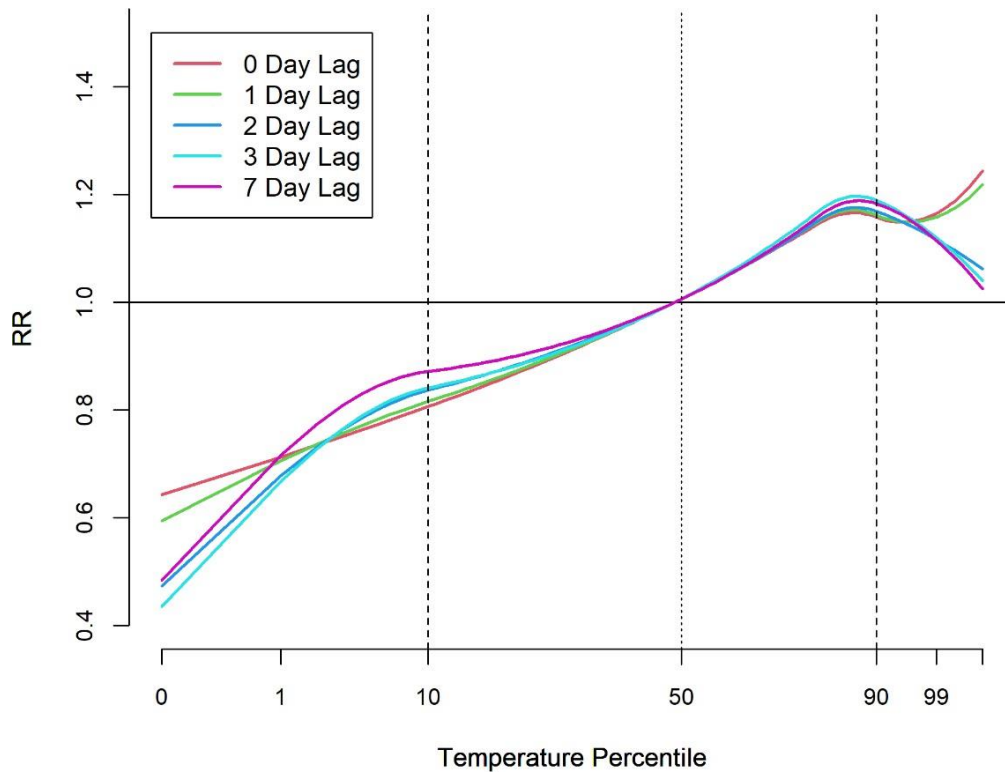

Note: This graph depicts the overall pooled association between daily maximum temperature and firearm incidents across 100 cities, using varying lag durations to assess how the relationship changes with the inclusion of increasing lagged days. The DLNM models were fit with knots at the 10<sup>th</sup>, 75<sup>th</sup>, and 90<sup>th</sup> percentiles. The relative risks depicted here represent the cumulative risk over the specific lag duration at each temperature percentile, pooled across the 100 cities.



**eFigure 6: Results of the Overall Heat and Firearm Incident Association in the Sensitivity Analyses Accounting for the 2020 Pandemic Period**

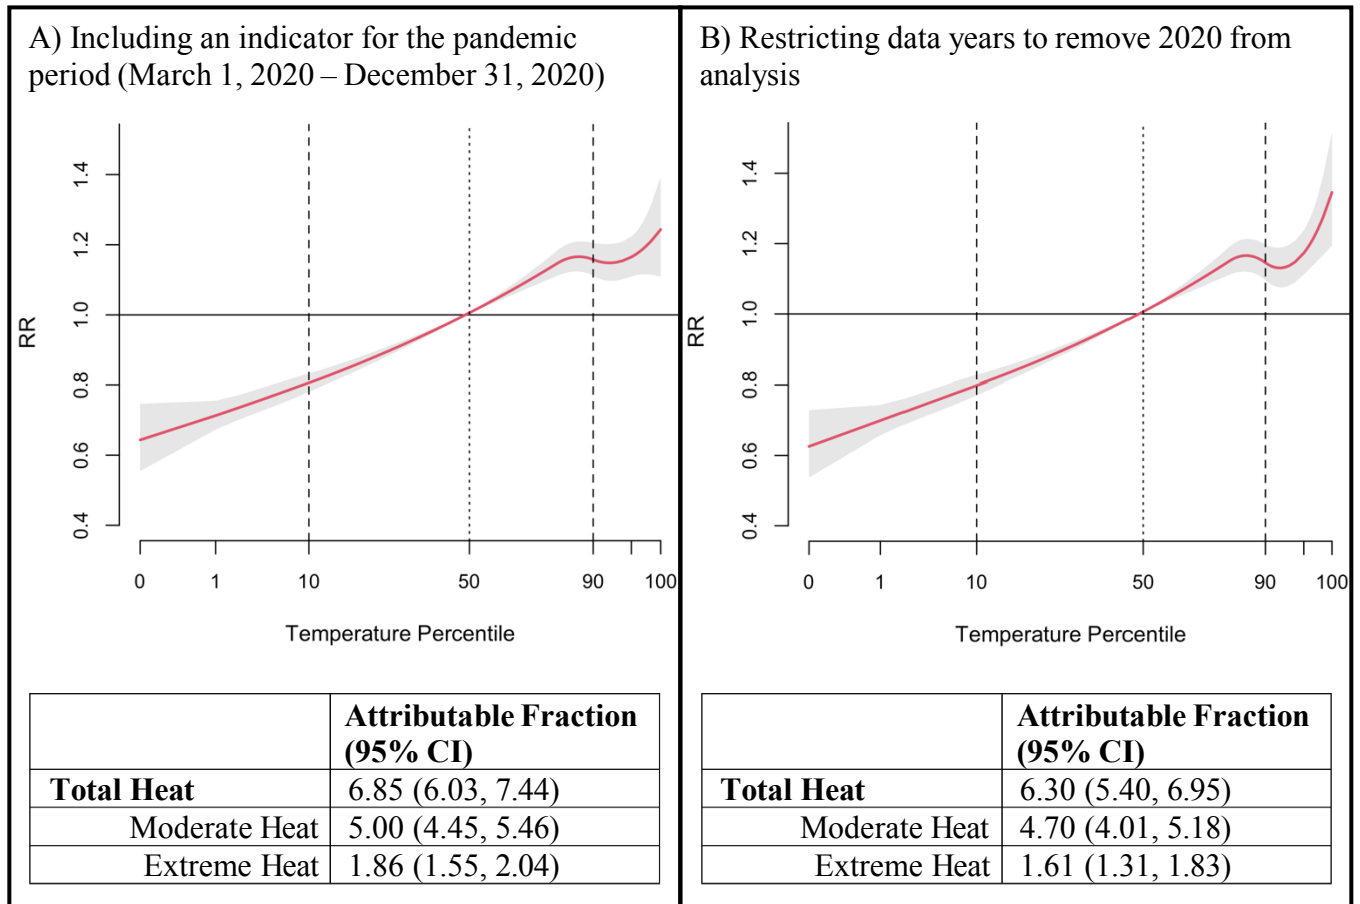

Note: These graphs depict the overall pooled association between daily maximum temperature and firearm incidents across 100 cities using two different approaches to account for the influence of the pandemic period. Both analyses are modeled similarly to the primary analysis with knots at the 10<sup>th</sup>, 75<sup>th</sup>, and 90<sup>th</sup> percentiles and including zero lag days.

**eTable 1: Sensitivity Analyses Assessing the Excess Risk of Firearm Incidents on Hot Days Using Different Numbers of Lag Days**

|                                   | <b>0 Day Lag</b>  | <b>1 Day Lag</b>     | <b>2 Day Lag</b>  | <b>3 Day Lag</b>  | <b>7 Day Lag</b>  |
|-----------------------------------|-------------------|----------------------|-------------------|-------------------|-------------------|
| <b>Attributable Risk Fraction</b> |                   |                      |                   |                   |                   |
| <b>All heat</b>                   | 6.85 (6.09, 7.46) | 12.22 (10.45, 13.18) | 6.73 (5.75, 7.46) | 7.29 (6.23, 8.05) | 7.17 (6.05, 7.86) |
| <b>Moderate heat</b>              | 5.00 (4.44, 5.43) | 9.10 (7.78, 9.80)    | 5.02 (4.23, 5.55) | 5.40 (4.63, 5.96) | 5.40 (4.63, 5.96) |
| <b>Extreme Heat</b>               | 1.86 (1.58, 2.05) | 3.14 (2.47, 3.41)    | 1.72 (1.39, 1.93) | 1.90 (1.55, 2.12) | 1.78 (1.42, 1.96) |
| <b>Attributable Risk Number</b>   |                   |                      |                   |                   |                   |
| <b>All heat</b>                   | 7973 (7092, 8688) | 14239 (12178, 15355) | 7842 (6697, 8691) | 8494 (7254, 9378) | 8350 (7053, 9162) |
| <b>Moderate heat</b>              | 5820 (5173, 6329) | 10607 (9066, 11416)  | 5848 (4929, 6466) | 6287 (5397, 6942) | 6288 (5392, 6941) |
| <b>Extreme Heat</b>               | 2164 (1839, 2388) | 3654 (2875, 3977)    | 2005 (1624, 2243) | 2219 (1800, 2467) | 2073 (1654, 2279) |
| <b>I<sup>2</sup> Statistic</b>    | 11.7%             | 8.5%                 | 4.3%              | 4.3%              | 5.6%              |
| <b>Cochran's Q Test</b>           | p=0.02            | p=0.08               | p=0.17            | p=0.24            | p=0.18            |

Note: The model with the 7-day lag included two internal knots to model the lagged temperature and firearm relationship. The 2- and 3-day lag models included a single internal knot in the lagged association. The 1-day lag model did not include any internal knots. The 0-day lag model necessarily included no lag at all.

**eTable 2: Analysis City Characteristics and Attributable Heat Estimates From the Zero-Lag Model**

| City                        | Climate Region | Total Firearm Incidents | Median Temp (F) | Max Incident Temp Perc. | Max Incident Temp (F) | Heat Attributable Incidents (%) | Heat Attributable Incidents (95% CI) |
|-----------------------------|----------------|-------------------------|-----------------|-------------------------|-----------------------|---------------------------------|--------------------------------------|
| <b>Akron, OH</b>            | Midwest        | 551                     | 62.7            | 79                      | 80.0                  | 6.53                            | (0.98, 11.77)                        |
| <b>Albuquerque, NM</b>      | Southwest      | 608                     | 71.0            | 96                      | 95.5                  | 5.12                            | (-0.98, 10.47)                       |
| <b>Atlanta, GA</b>          | Southeast      | 1172                    | 75.2            | 96                      | 92.3                  | 5.39                            | (0.32, 9.84)                         |
| <b>Augusta, GA</b>          | Southeast      | 373                     | 78.4            | 76                      | 89.5                  | 1.60                            | (-4.72, 6.93)                        |
| <b>Austin, TX</b>           | Great Plains   | 398                     | 83.6            | 77                      | 94.6                  | 1.66                            | (-4.46, 7.4)                         |
| <b>Bakersfield, CA</b>      | Southwest      | 367                     | 82.7            | 80                      | 103.4                 | 2.62                            | (-5.85, 9.09)                        |
| <b>Baltimore, MD</b>        | Northeast      | 4659                    | 65.8            | 78                      | 82.3                  | 6.15                            | (2.03, 9.77)                         |
| <b>Baton Rouge, LA</b>      | Southeast      | 874                     | 82.1            | 66                      | 86.5                  | -0.36                           | (-4.91, 3.46)                        |
| <b>Birmingham, AL</b>       | Southeast      | 1131                    | 76.1            | 74                      | 86.1                  | -0.35                           | (-5.91, 4.4)                         |
| <b>Boston, MA</b>           | Northeast      | 907                     | 59.5            | 91                      | 84.5                  | 12.51                           | (5.76, 18.45)                        |
| <b>Bridgeport, CT</b>       | Northeast      | 523                     | 61.1            | 92                      | 84.9                  | 12.47                           | (5.37, 17.89)                        |
| <b>Buffalo, NY</b>          | Northeast      | 848                     | 58.3            | 93                      | 84.8                  | 12.88                           | (5.84, 18.78)                        |
| <b>Charlotte, NC</b>        | Southeast      | 1249                    | 73.8            | 77                      | 87.3                  | 4.94                            | (-0.51, 9.59)                        |
| <b>Chattanooga, TN</b>      | Southeast      | 727                     | 73.7            | 81                      | 86.7                  | 6.24                            | (0.26, 11.24)                        |
| <b>Chicago, IL</b>          | Midwest        | 16136                   | 61.0            | 86                      | 83.6                  | 10.69                           | (7.51, 13.83)                        |
| <b>Cincinnati, OH</b>       | Midwest        | 1185                    | 67.0            | 96                      | 90.3                  | 5.37                            | (-0.56, 10.57)                       |
| <b>Cleveland, OH</b>        | Midwest        | 1992                    | 61.8            | 81                      | 80.6                  | 9.94                            | (4.73, 14.61)                        |
| <b>Colorado Springs, CO</b> | Southwest      | 498                     | 61.3            | 95                      | 86.6                  | 6.79                            | (1.23, 11.4)                         |
| <b>Columbus, GA</b>         | Southeast      | 527                     | 79.0            | 74                      | 88.2                  | 0.26                            | (-5.24, 5.01)                        |
| <b>Columbus, OH</b>         | Midwest        | 1648                    | 65.4            | 83                      | 84.5                  | 6.32                            | (1.11, 10.74)                        |
| <b>Dallas, TX</b>           | Great Plains   | 1352                    | 80.8            | 82                      | 96.5                  | 5.33                            | (-0.59, 10.65)                       |
| <b>Dayton, OH</b>           | Midwest        | 653                     | 65.9            | 96                      | 90.3                  | 5.13                            | (-0.75, 10.39)                       |
| <b>Denver, CO</b>           | Southwest      | 700                     | 64.7            | 87                      | 88.4                  | 7.07                            | (0.73, 12.42)                        |
| <b>Detroit, MI</b>          | Midwest        | 2877                    | 60.5            | 94                      | 87.9                  | 11.60                           | (6.62, 15.59)                        |
| <b>Durham, NC</b>           | Southeast      | 598                     | 73.5            | 87                      | 90.2                  | 5.65                            | (0.11, 10.53)                        |
| <b>Flint, MI</b>            | Midwest        | 463                     | 58.4            | 93                      | 85.8                  | 8.72                            | (1.27, 14.24)                        |
| <b>Fort Wayne, IN</b>       | Midwest        | 507                     | 63.2            | 87                      | 84.9                  | 7.14                            | (0.45, 12.49)                        |
| <b>Fort Worth, TX</b>       | Great Plains   | 758                     | 80.8            | 80                      | 95.8                  | 1.72                            | (-3.83, 6.85)                        |

|                         |              |      |      |    |       |       |                |
|-------------------------|--------------|------|------|----|-------|-------|----------------|
| <b>Fresno, CA</b>       | Southwest    | 715  | 80.4 | 78 | 100.5 | 3.64  | (-2.66, 9.22)  |
| <b>Gary, IN</b>         | Midwest      | 634  | 62.1 | 92 | 87.1  | 9.92  | (3.48, 14.91)  |
| <b>Grand Rapids, MI</b> | Midwest      | 311  | 58.4 | 92 | 84.9  | 12.42 | (4.29, 18.91)  |
| <b>Greensboro, NC</b>   | Southeast    | 540  | 71.9 | 76 | 85.4  | 2.19  | (-3.92, 7.55)  |
| <b>Hampton, VA</b>      | Southeast    | 456  | 68.0 | 79 | 81.7  | 4.99  | (-1.46, 10.33) |
| <b>Hartford, CT</b>     | Northeast    | 469  | 60.6 | 86 | 81.8  | 9.45  | (2.96, 15.06)  |
| <b>Houston, TX</b>      | Great Plains | 2999 | 82.5 | 80 | 91.2  | 3.79  | (-0.65, 7.64)  |
| <b>Huntsville, AL</b>   | Southeast    | 332  | 74.4 | 77 | 86.2  | 2.96  | (-3.75, 8.54)  |
| <b>Indianapolis, IN</b> | Midwest      | 2150 | 65.6 | 96 | 89.1  | 6.23  | (1.19, 10.62)  |
| <b>Jackson, MS</b>      | Southeast    | 1049 | 79.6 | 80 | 89.7  | 1.85  | (-2.86, 6.05)  |
| <b>Jacksonville, FL</b> | Southeast    | 1888 | 81.5 | 96 | 92.4  | 2.51  | (-1.98, 6.24)  |
| <b>Jersey City, NJ</b>  | Northeast    | 426  | 62.9 | 88 | 84.4  | 11.23 | (5.38, 16.23)  |
| <b>Kansas City, KS</b>  | Great Plains | 326  | 68.9 | 85 | 89.4  | 7.86  | (0.88, 13.43)  |
| <b>Kansas City, MO</b>  | Midwest      | 1365 | 68.8 | 93 | 93.0  | 6.13  | (0.78, 10.73)  |
| <b>Knoxville, TN</b>    | Southeast    | 361  | 72.1 | 80 | 85.3  | 4.04  | (-1.66, 9.27)  |
| <b>Las Vegas, NV</b>    | Southwest    | 497  | 76.9 | 96 | 104.1 | 4.57  | (-2.57, 9.74)  |
| <b>Lexington, KY</b>    | Southeast    | 592  | 67.5 | 96 | 89.1  | 5.97  | (0.09, 10.72)  |
| <b>Little Rock, AR</b>  | Southeast    | 881  | 75.6 | 79 | 89.2  | 4.95  | (0.13, 9.25)   |
| <b>Long Beach, CA</b>   | Southwest    | 406  | 66.4 | 67 | 69.6  | -0.10 | (-10.84, 8.37) |
| <b>Los Angeles, CA</b>  | Southwest    | 1363 | 72.3 | 58 | 74.2  | -1.08 | (-7.59, 3.92)  |
| <b>Louisville, KY</b>   | Southeast    | 1529 | 69.1 | 96 | 90.7  | 4.03  | (-0.69, 8.71)  |
| <b>Macon, GA</b>        | Southeast    | 427  | 78.9 | 78 | 90.4  | 2.01  | (-3.85, 7.18)  |
| <b>Memphis, TN</b>      | Southeast    | 2867 | 75.5 | 82 | 90.5  | 5.51  | (1.01, 9.3)    |
| <b>Miami, FL</b>        | Southeast    | 388  | 83.9 | 28 | 80.0  | -1.94 | (-8.85, 3.82)  |
| <b>Milwaukee, WI</b>    | Midwest      | 2867 | 55.8 | 93 | 83.5  | 11.92 | (6.79, 16.99)  |
| <b>Minneapolis, MN</b>  | Midwest      | 788  | 57.8 | 87 | 83.7  | 15.92 | (9.04, 22.12)  |
| <b>Mobile, AL</b>       | Southeast    | 567  | 80.3 | 76 | 87.7  | 2.37  | (-2.65, 7.36)  |
| <b>Montgomery, AL</b>   | Southeast    | 658  | 79.9 | 75 | 89.1  | 0.62  | (-5.08, 5.47)  |
| <b>Nashville, TN</b>    | Southeast    | 1645 | 72.7 | 75 | 85.4  | 2.37  | (-2.54, 6.78)  |
| <b>New Haven, CT</b>    | Northeast    | 392  | 60.3 | 95 | 85.1  | 11.58 | (4.15, 17.6)   |
| <b>New Orleans, LA</b>  | Southeast    | 2767 | 81.7 | 80 | 88.9  | 3.47  | (-0.56, 6.92)  |
| <b>New York, NY</b>     | Northeast    | 4302 | 62.8 | 87 | 83.8  | 15.08 | (10.85, 19.28) |

|                             |              |      |      |    |      |       |                |
|-----------------------------|--------------|------|------|----|------|-------|----------------|
| <b>Newark, NJ</b>           | Northeast    | 896  | 63.0 | 85 | 83.3 | 9.51  | (4.25, 14.42)  |
| <b>Newport News, VA</b>     | Southeast    | 514  | 69.4 | 81 | 83.9 | 5.45  | (-0.89, 10.71) |
| <b>Norfolk, VA</b>          | Southeast    | 682  | 69.7 | 81 | 83.5 | 5.26  | (-0.51, 10.4)  |
| <b>North Charleston, SC</b> | Southeast    | 383  | 78.6 | 96 | 93.1 | 2.96  | (-3.63, 7.95)  |
| <b>Oakland, CA</b>          | Southwest    | 1364 | 68.1 | 96 | 85.6 | 3.25  | (-3.37, 8.94)  |
| <b>Oklahoma City, OK</b>    | Great Plains | 887  | 75.0 | 82 | 93.2 | 3.95  | (-2.26, 9.38)  |
| <b>Omaha, NE</b>            | Great Plains | 721  | 65.9 | 82 | 87.4 | 8.20  | (1.87, 13.45)  |
| <b>Orlando, FL</b>          | Southeast    | 384  | 85.6 | 76 | 90.0 | 0.39  | (-4.52, 4.67)  |
| <b>Paterson, NJ</b>         | Northeast    | 502  | 62.2 | 96 | 88.2 | 8.83  | (3.52, 13.75)  |
| <b>Peoria, IL</b>           | Midwest      | 434  | 65.3 | 89 | 88.6 | 10.25 | (2.77, 16.31)  |
| <b>Philadelphia, PA</b>     | Northeast    | 5736 | 64.7 | 87 | 85.2 | 6.07  | (2.1, 9.2)     |
| <b>Phoenix, AZ</b>          | Southwest    | 1148 | 86.8 | 57 | 91.3 | -1.03 | (-8.88, 5)     |
| <b>Pittsburgh, PA</b>       | Northeast    | 872  | 64.5 | 93 | 87.1 | 9.67  | (4.31, 14.63)  |
| <b>Portland, OR</b>         | Northwest    | 524  | 61.5 | 96 | 85.5 | 8.71  | (1.57, 14.7)   |
| <b>Portsmouth, VA</b>       | Southeast    | 414  | 72.0 | 81 | 85.5 | 4.18  | (-1.89, 9.29)  |
| <b>Raleigh, NC</b>          | Southeast    | 361  | 73.7 | 76 | 86.6 | 2.07  | (-4.35, 7.31)  |
| <b>Richmond, VA</b>         | Southeast    | 1126 | 71.0 | 80 | 86.3 | 4.33  | (-1.59, 9.08)  |
| <b>Rochester, NY</b>        | Northeast    | 796  | 57.9 | 96 | 86.4 | 8.28  | (1.5, 14.14)   |
| <b>Rockford, IL</b>         | Midwest      | 556  | 61.0 | 93 | 86.8 | 14.25 | (8.12, 19.59)  |
| <b>San Antonio, TX</b>      | Great Plains | 1841 | 85.3 | 77 | 95.5 | 2.23  | (-2.78, 6.44)  |
| <b>San Diego, CA</b>        | Southwest    | 385  | 76.3 | 54 | 77.5 | -0.96 | (-7.1, 4.4)    |
| <b>San Francisco, CA</b>    | Southwest    | 421  | 60.1 | 80 | 64.9 | 2.65  | (-6.9, 10.73)  |
| <b>Savannah, GA</b>         | Southeast    | 607  | 80.0 | 76 | 87.7 | 0.82  | (-4.58, 5)     |
| <b>Seattle, WA</b>          | Northwest    | 440  | 59.7 | 96 | 84.4 | 12.00 | (4.34, 17.75)  |
| <b>Shreveport, LA</b>       | Southeast    | 912  | 81.0 | 84 | 93.1 | 6.07  | (1, 10.75)     |
| <b>South Bend, IN</b>       | Midwest      | 401  | 61.5 | 93 | 86.6 | 13.26 | (6.35, 19.42)  |
| <b>Springfield, MA</b>      | Northeast    | 367  | 59.8 | 96 | 86.3 | 6.56  | (0.2, 12.58)   |
| <b>St. Louis, MO</b>        | Midwest      | 2959 | 69.0 | 81 | 87.6 | 6.68  | (1.43, 11.63)  |
| <b>St. Paul, MN</b>         | Midwest      | 336  | 57.7 | 90 | 85.0 | 10.97 | (4.73, 16.34)  |
| <b>Stockton, CA</b>         | Southwest    | 519  | 77.1 | 79 | 96.6 | 4.17  | (-3.85, 11.2)  |
| <b>Syracuse, NY</b>         | Northeast    | 507  | 58.0 | 92 | 83.6 | 13.29 | (7.45, 18.68)  |
| <b>Toledo, OH</b>           | Midwest      | 901  | 61.9 | 88 | 85.5 | 10.07 | (3.99, 15.76)  |

|                          |              |      |      |    |      |      |                |
|--------------------------|--------------|------|------|----|------|------|----------------|
| <b>Topeka, KS</b>        | Great Plains | 325  | 69.5 | 93 | 94.4 | 5.67 | (-0.67, 10.87) |
| <b>Trenton, NJ</b>       | Northeast    | 527  | 64.5 | 96 | 89.7 | 8.29 | (1.94, 13.46)  |
| <b>Tucson, AZ</b>        | Southwest    | 308  | 83.2 | 76 | 95.7 | 1.83 | (-4.66, 7.78)  |
| <b>Tulsa, OK</b>         | Great Plains | 981  | 74.3 | 82 | 91.4 | 3.92 | (-2.36, 8.97)  |
| <b>Washington, DC</b>    | Northeast    | 2531 | 67.4 | 80 | 84.5 | 5.96 | (1.13, 9.95)   |
| <b>Wichita, KS</b>       | Great Plains | 587  | 71.3 | 92 | 95.8 | 6.08 | (0.36, 11.16)  |
| <b>Wilmington, DE</b>    | Northeast    | 710  | 65.1 | 81 | 83.0 | 6.19 | (0.13, 11.5)   |
| <b>Winston-Salem, NC</b> | Southeast    | 408  | 71.7 | 96 | 91.7 | 4.92 | (-1.47, 10.53) |

eFigure 7: 100 City- Specific Result Graphs

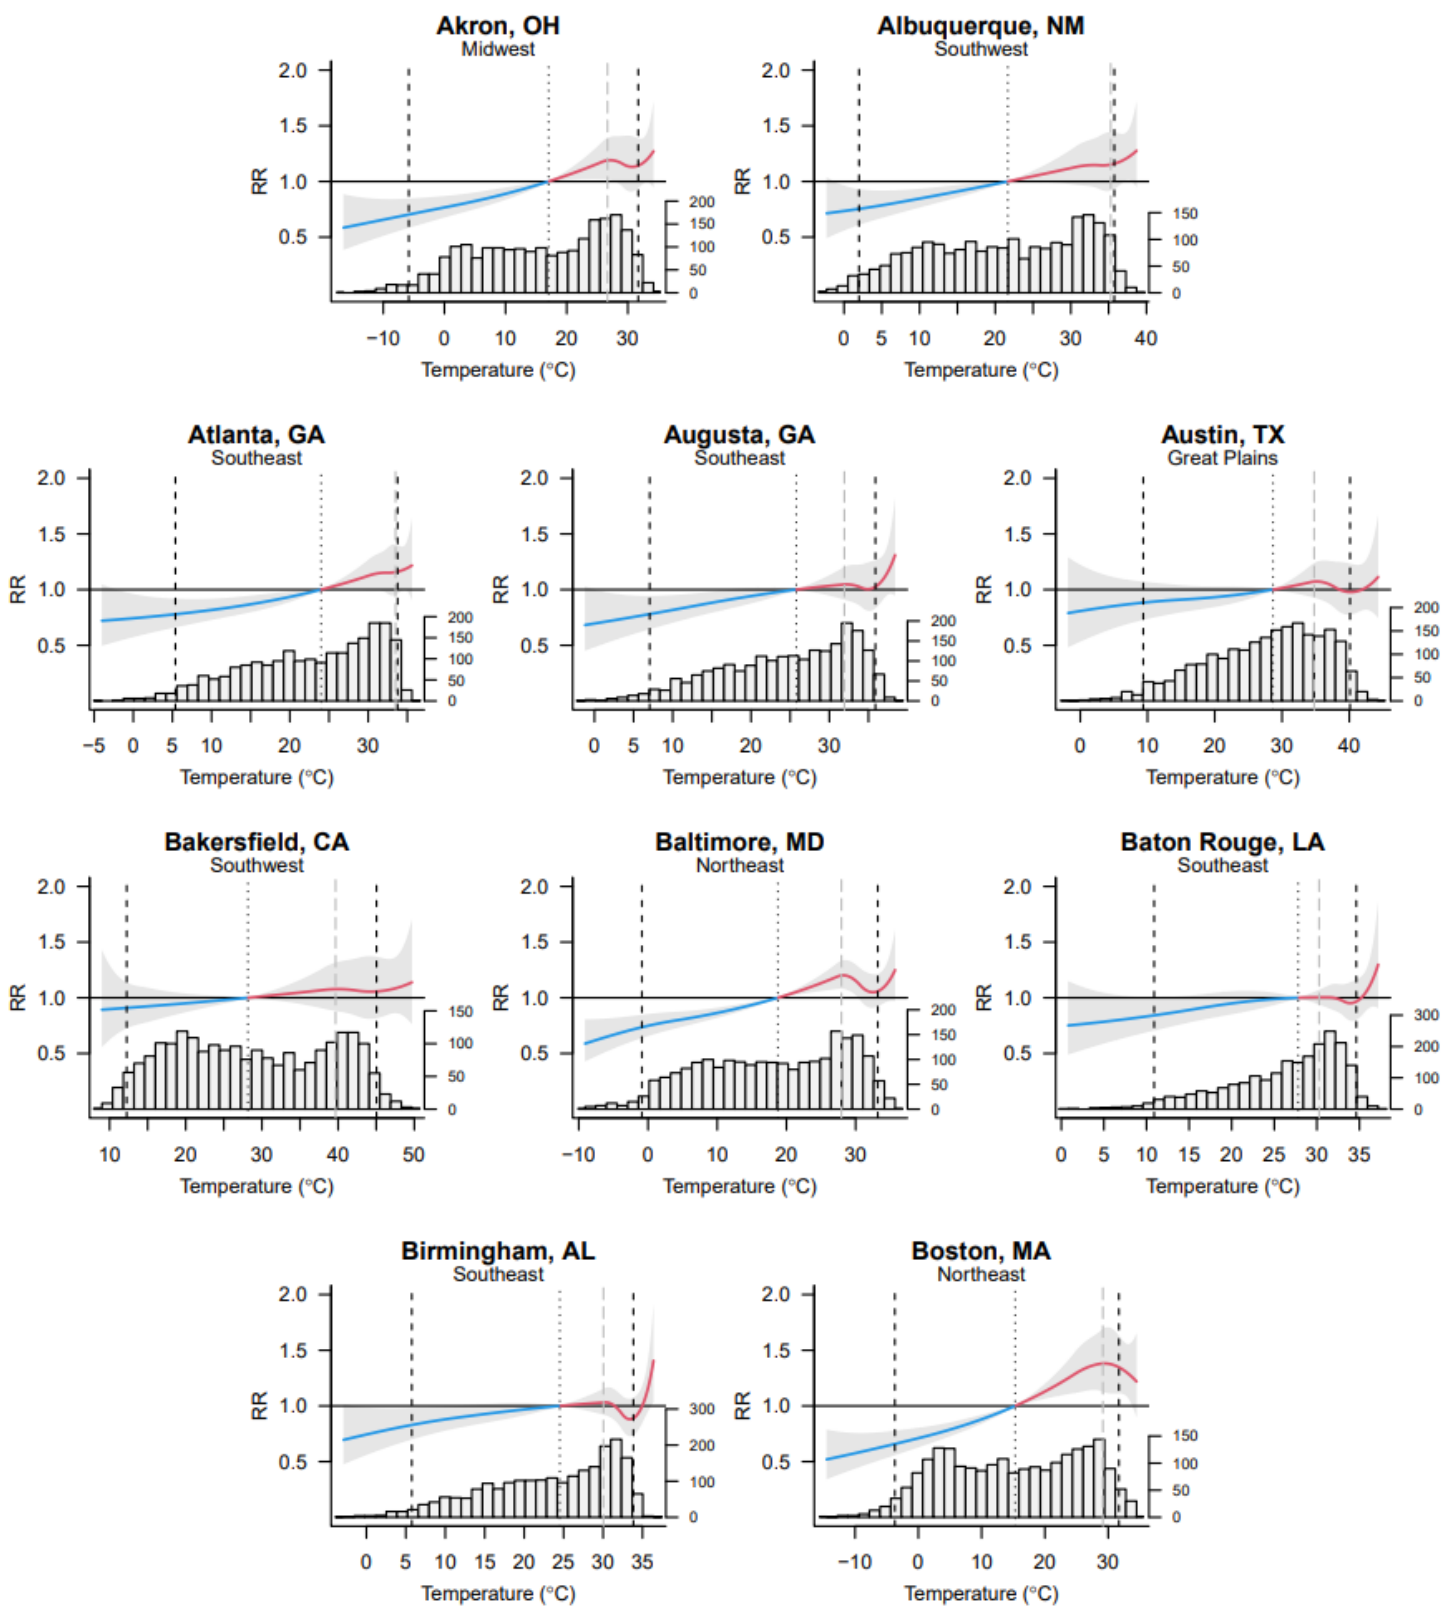

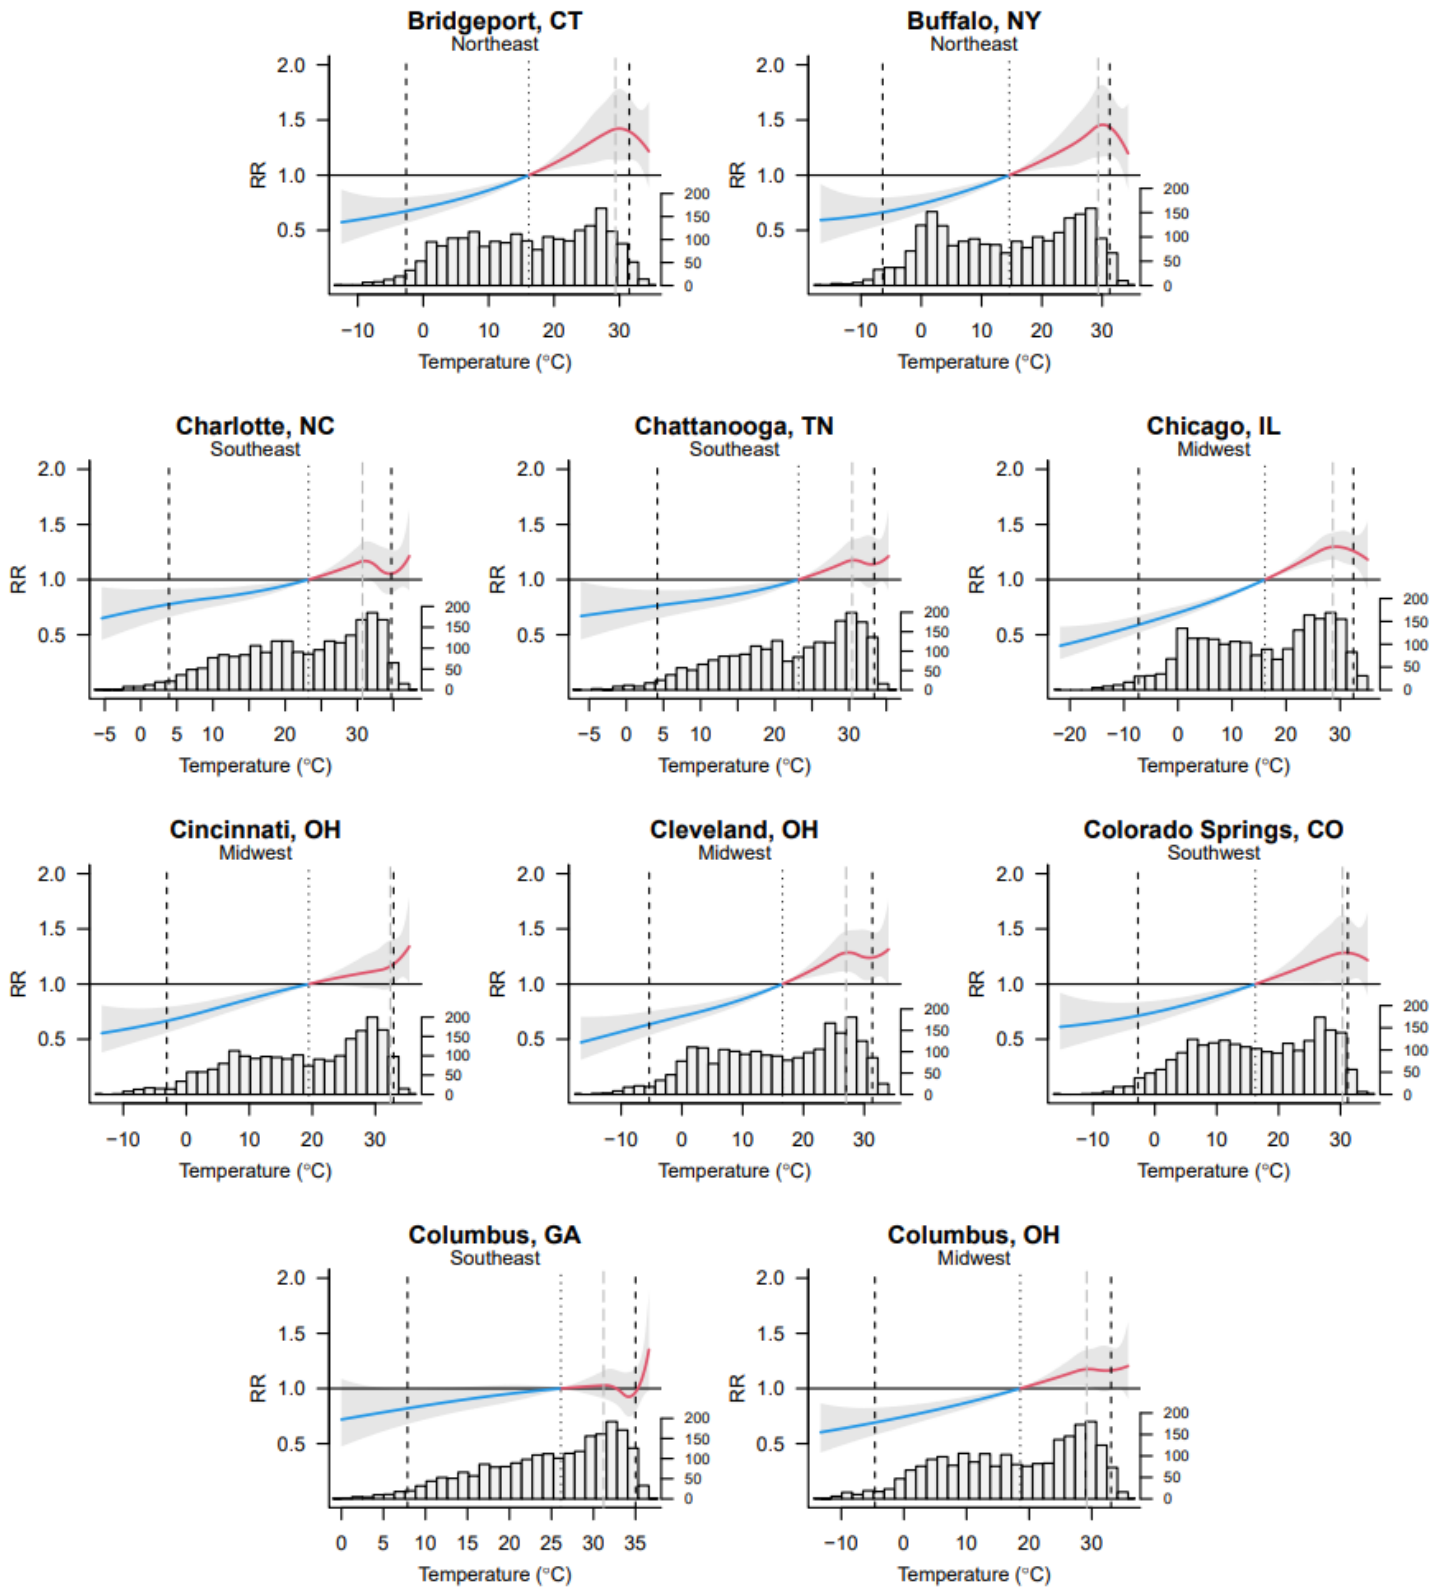



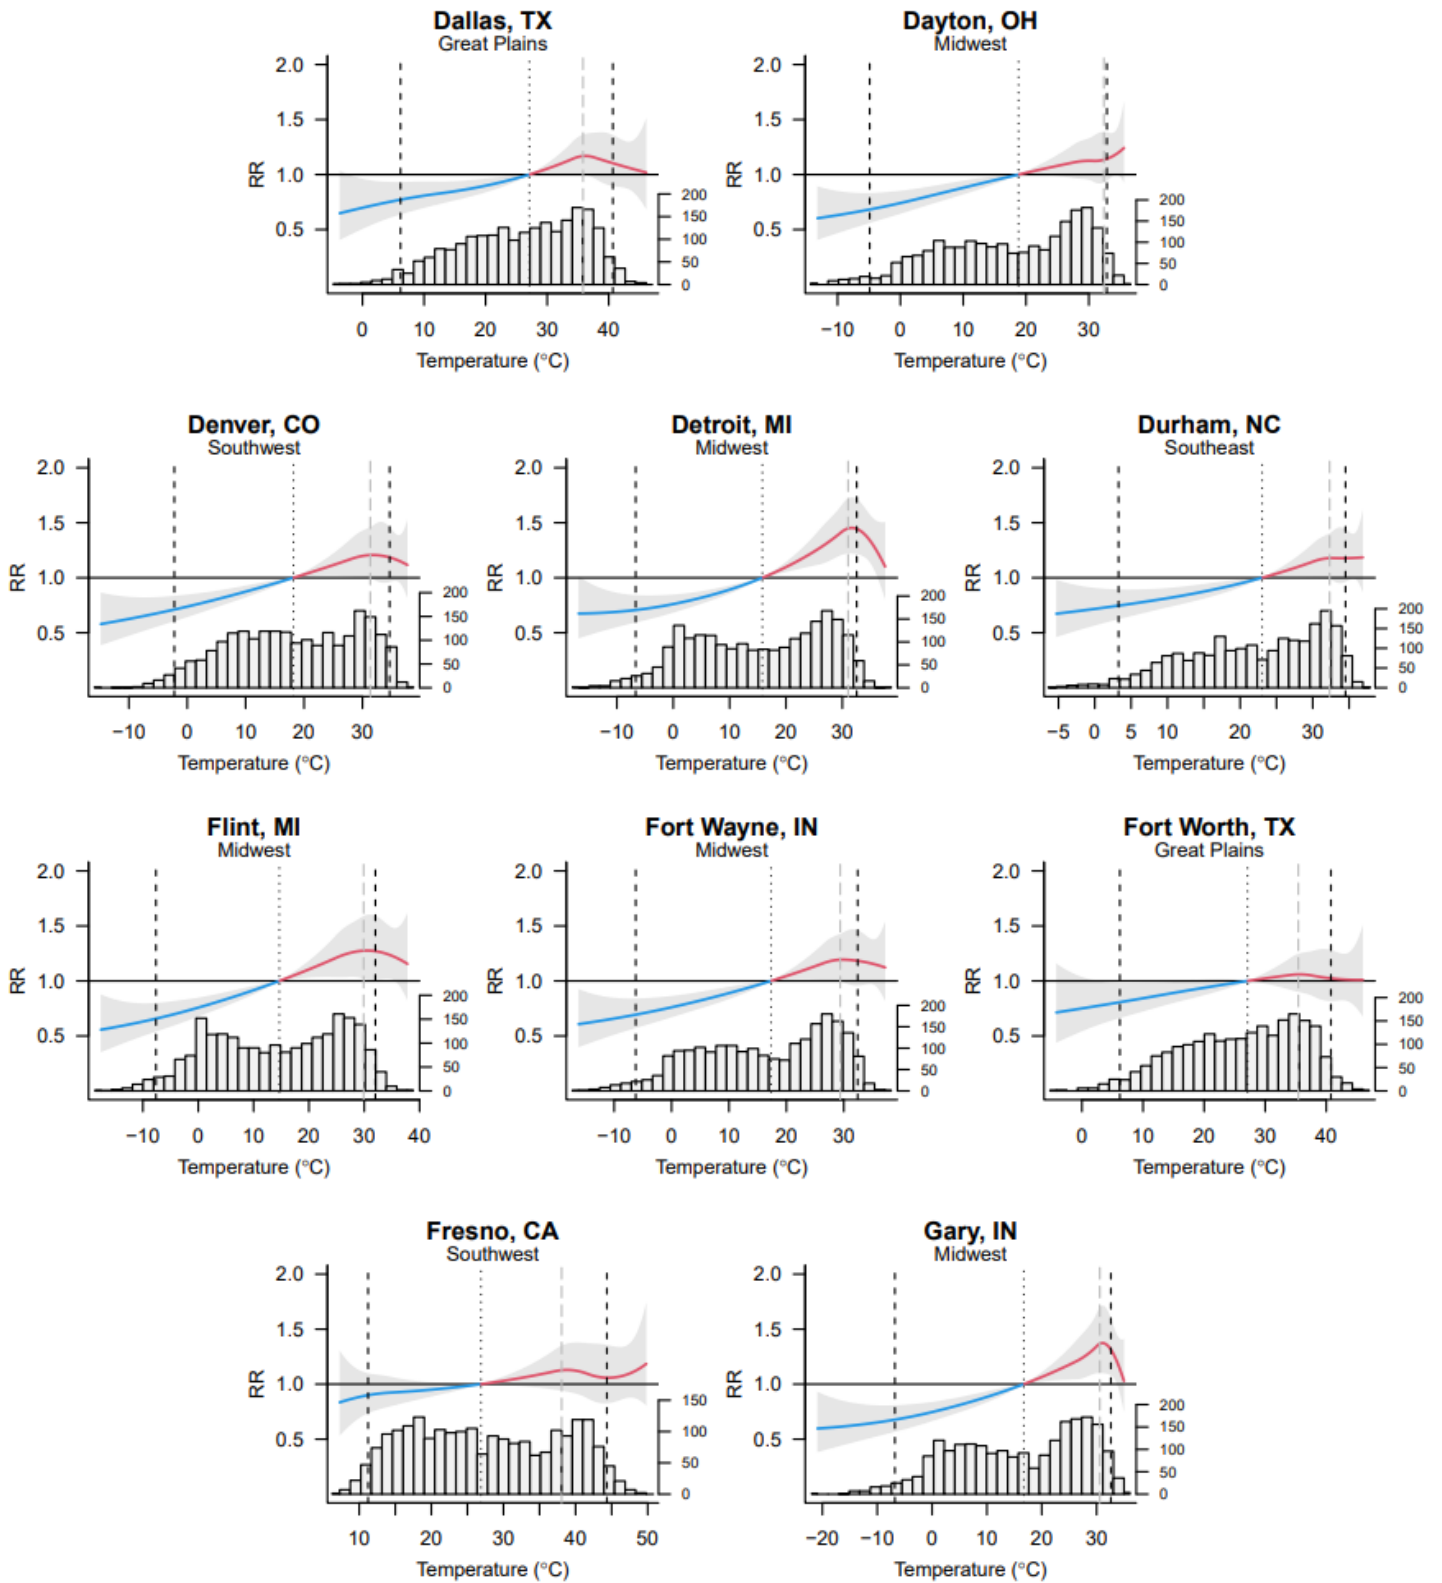

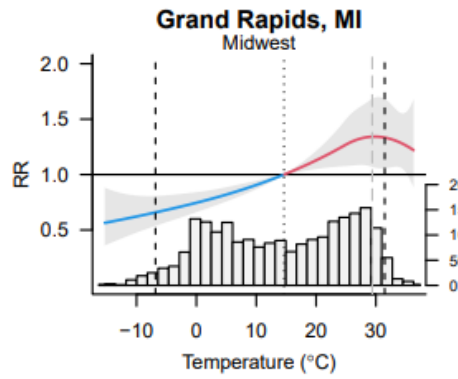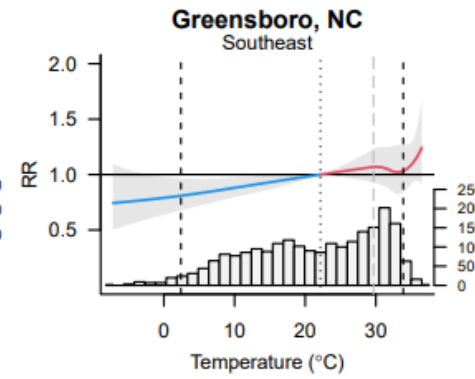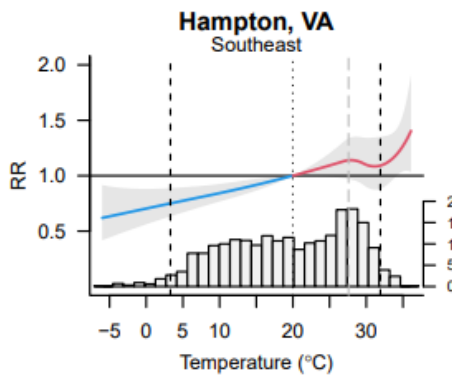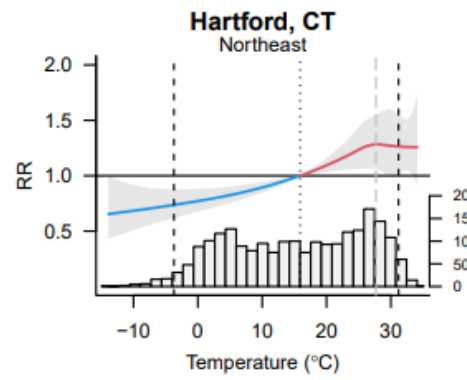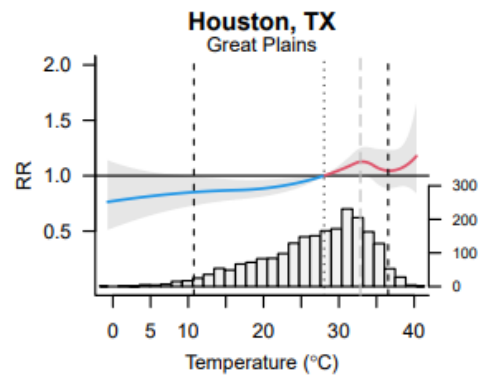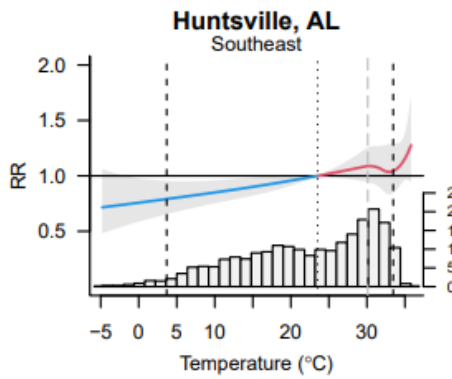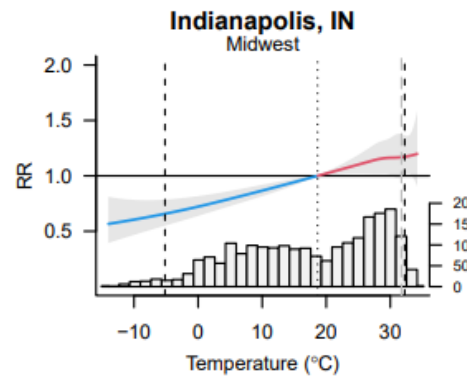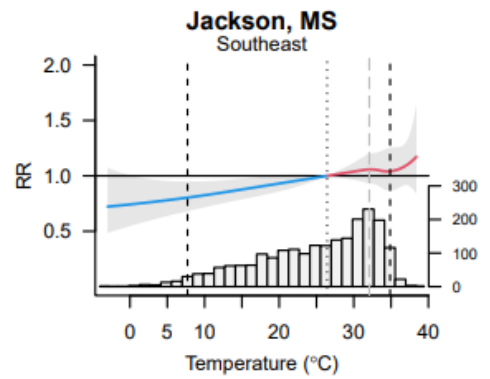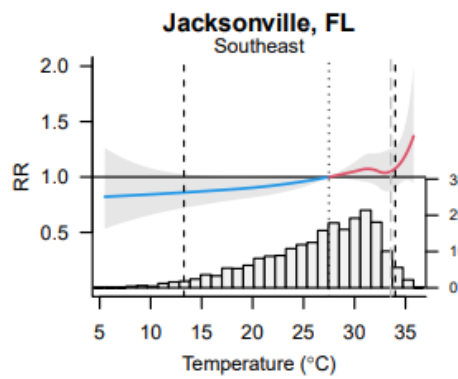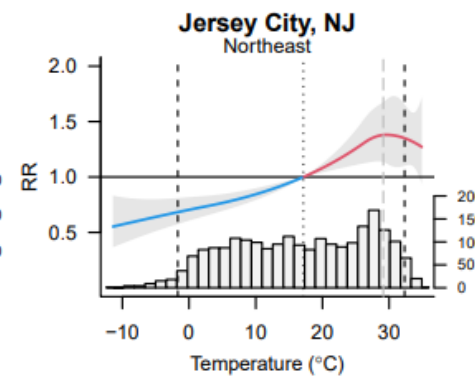

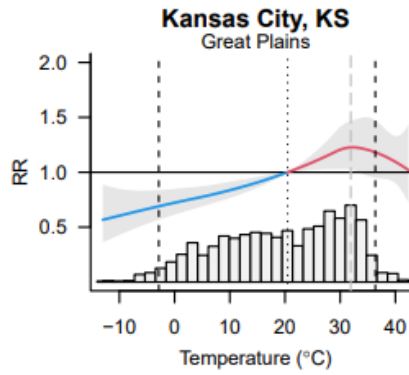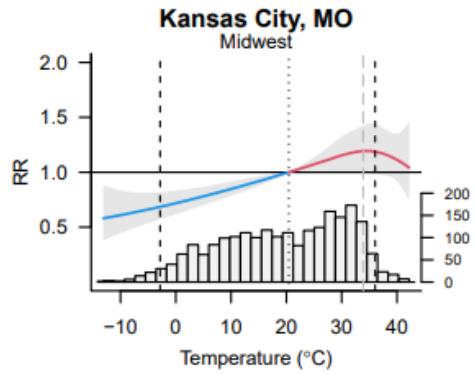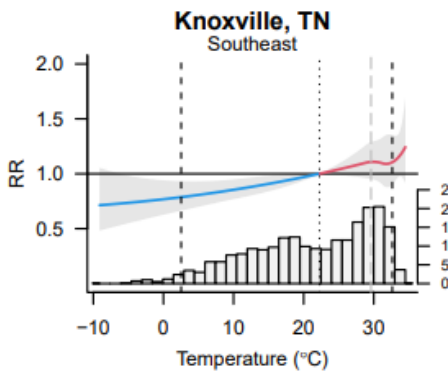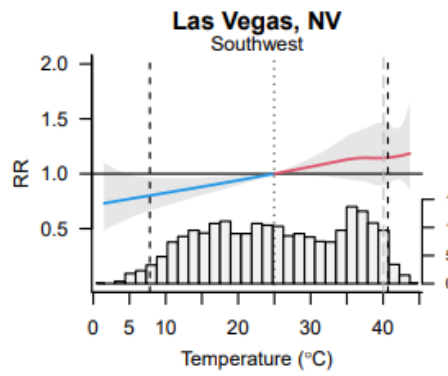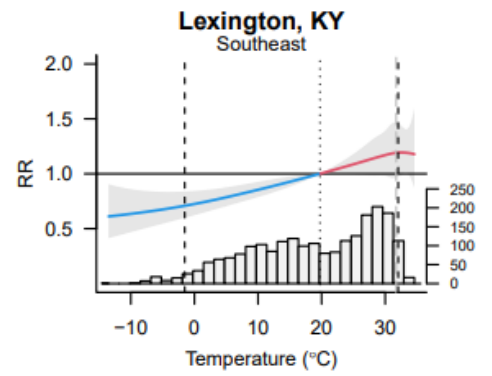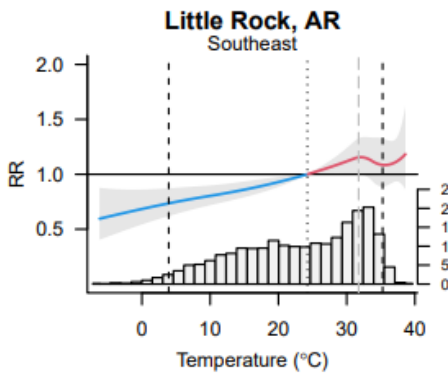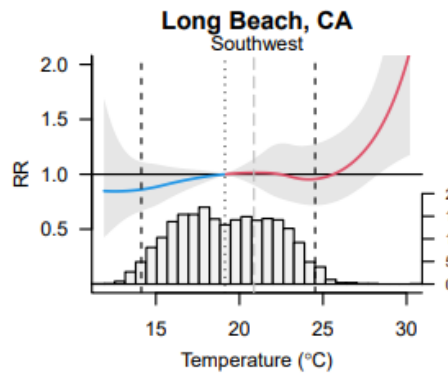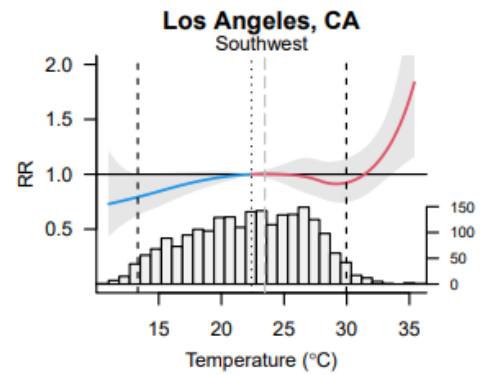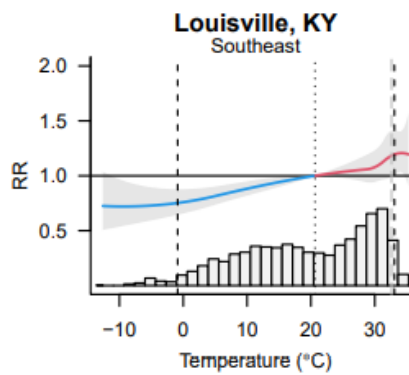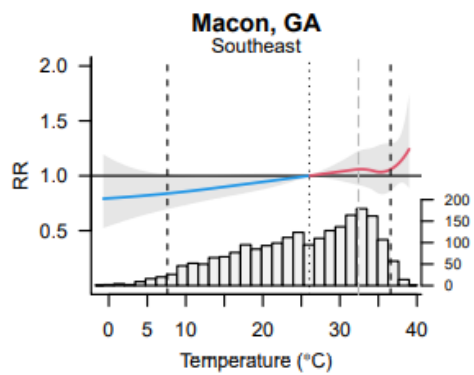

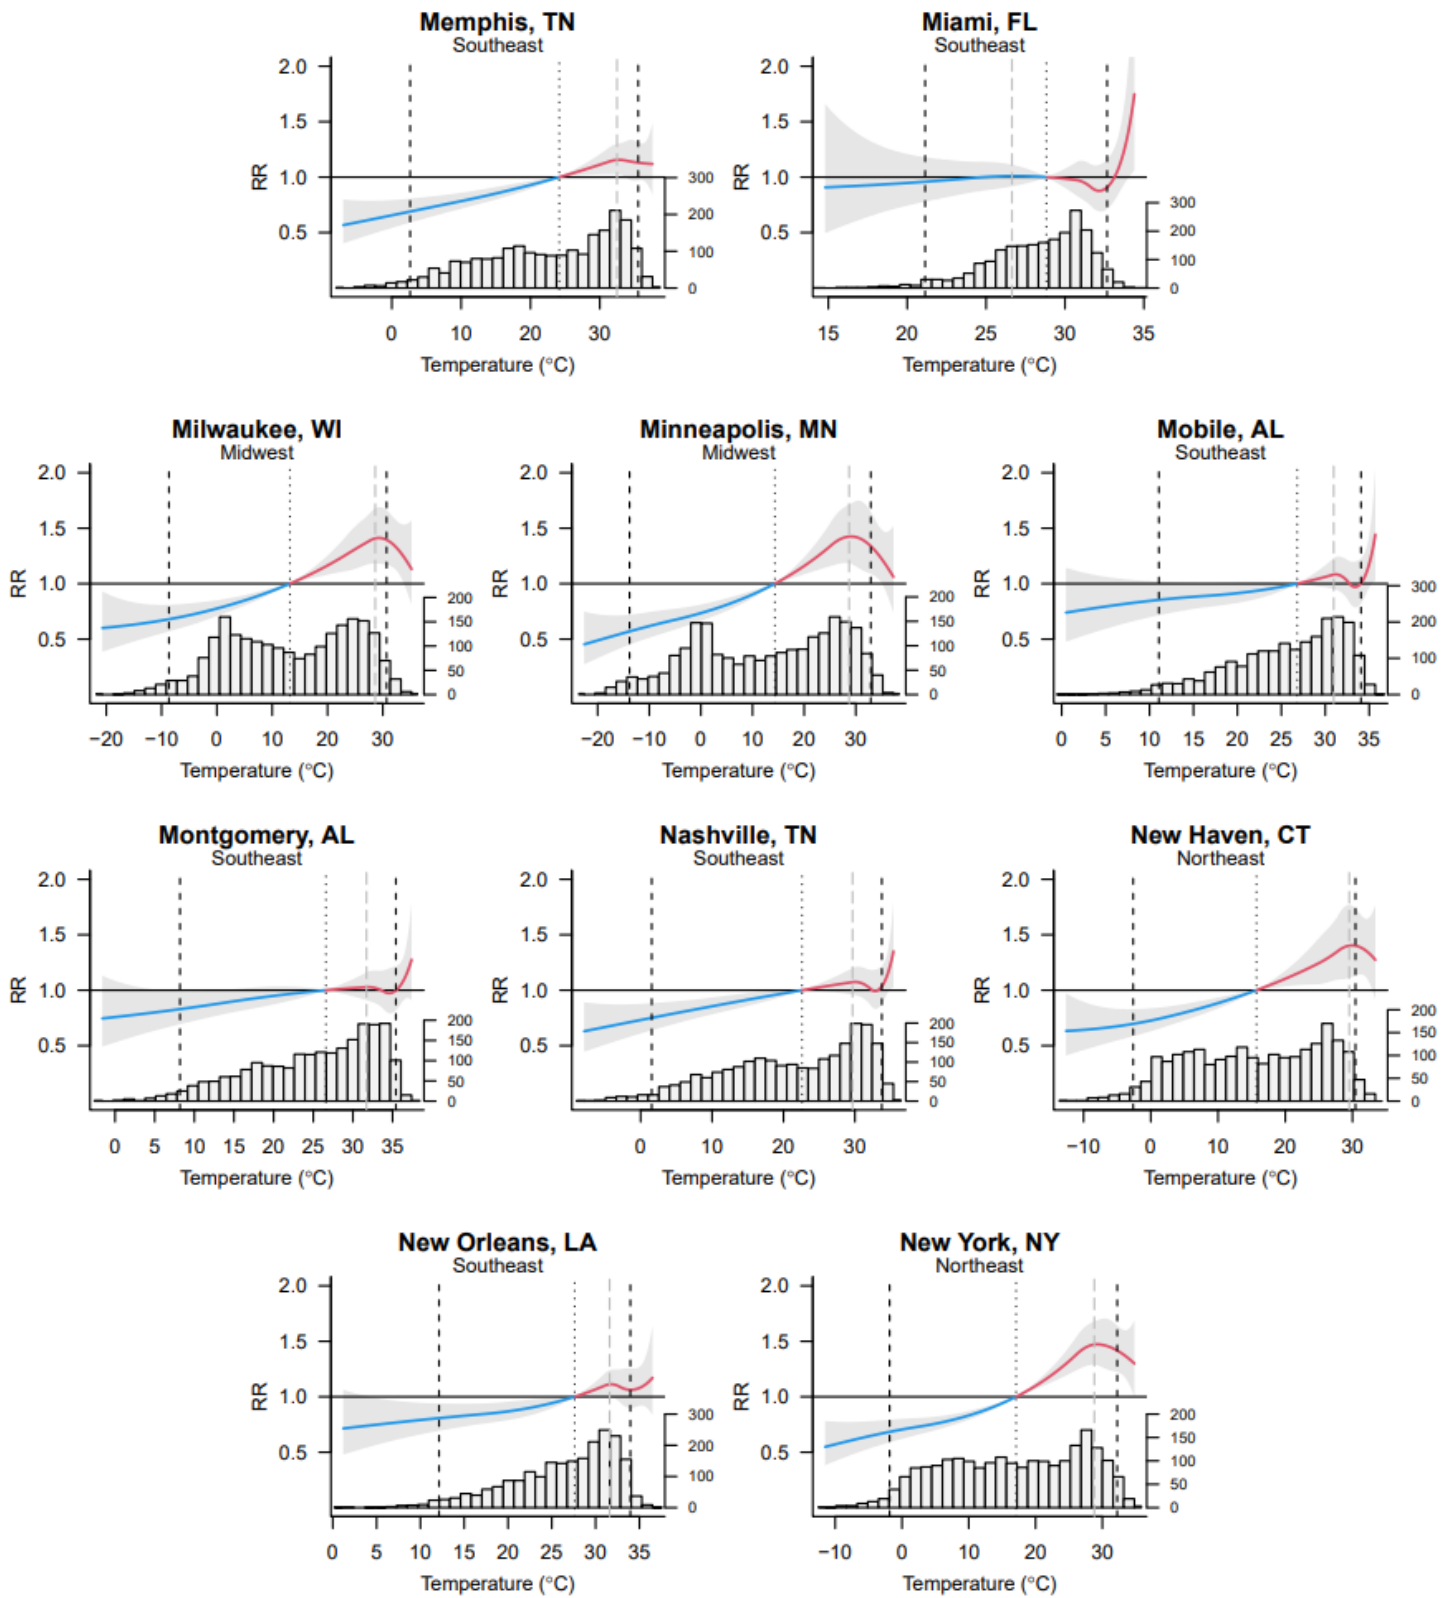

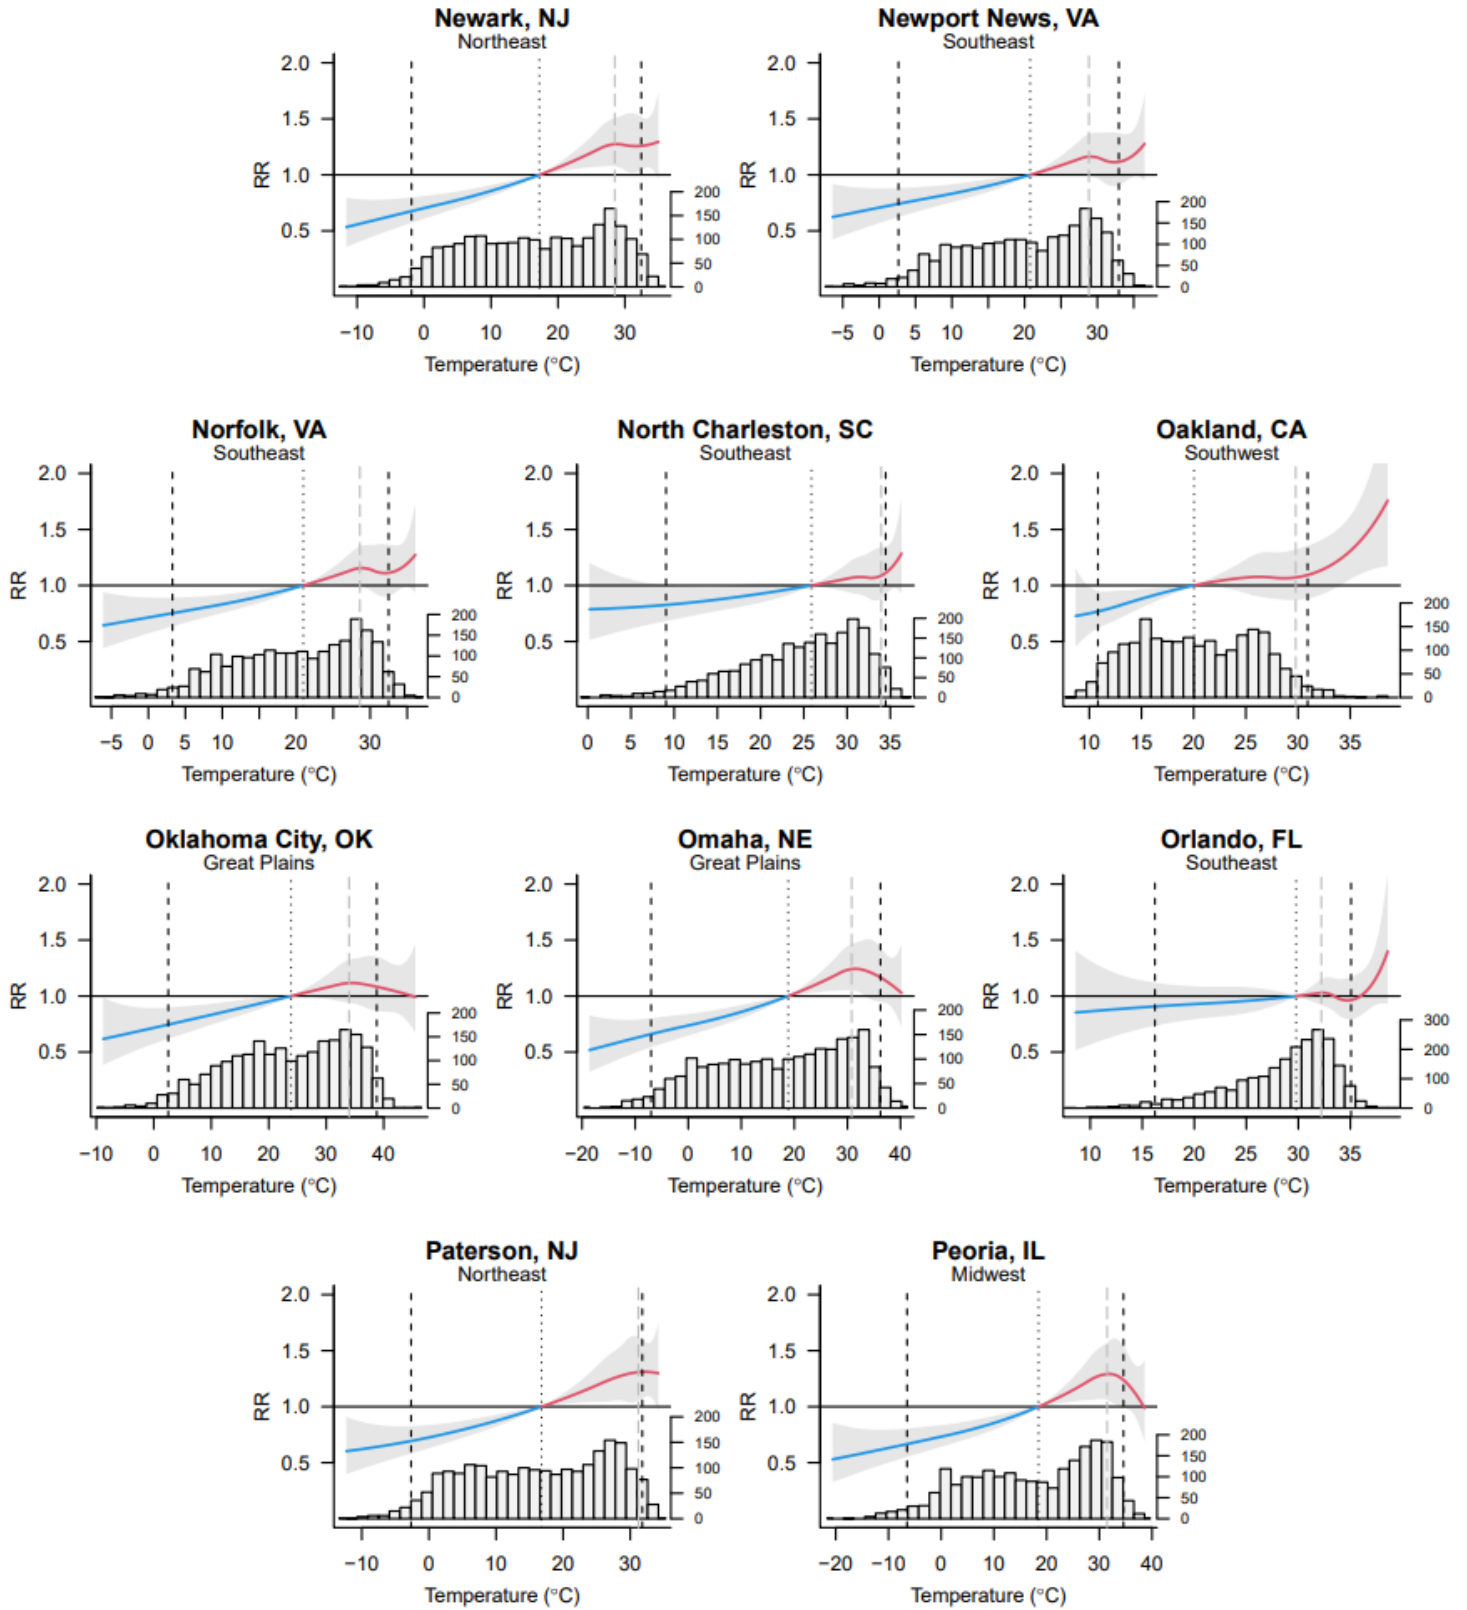

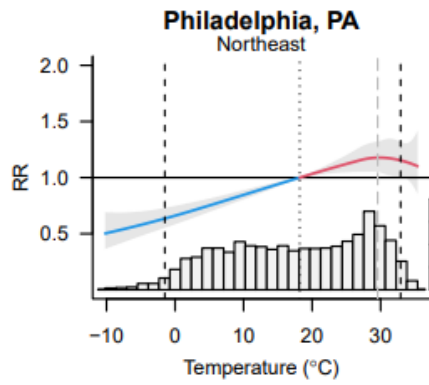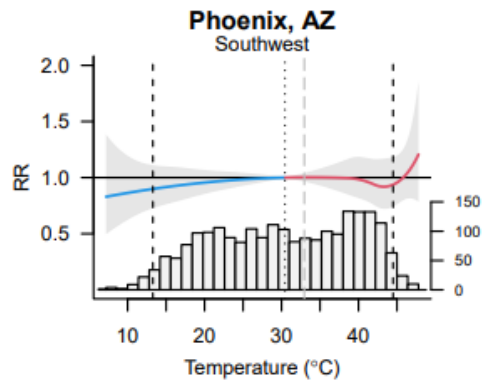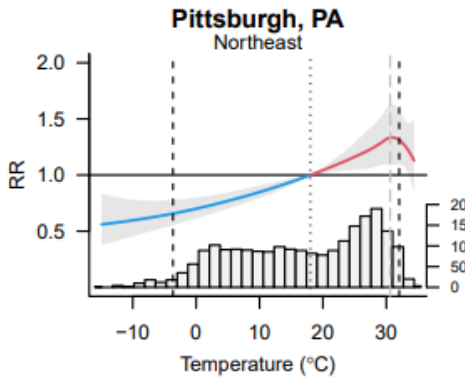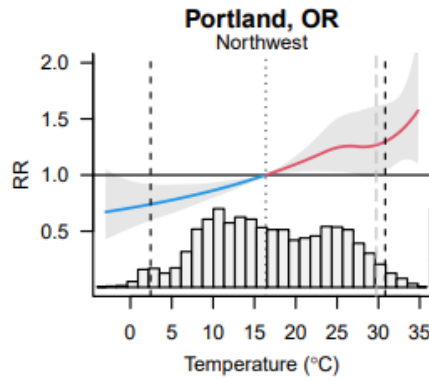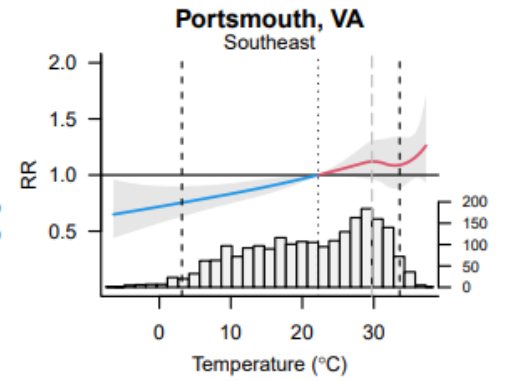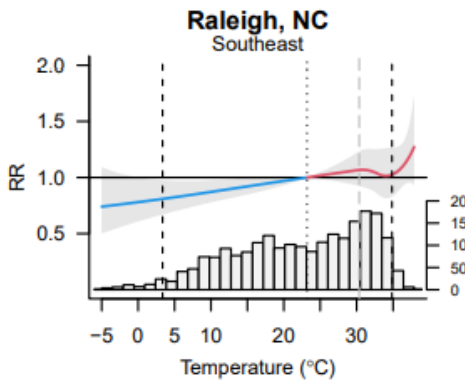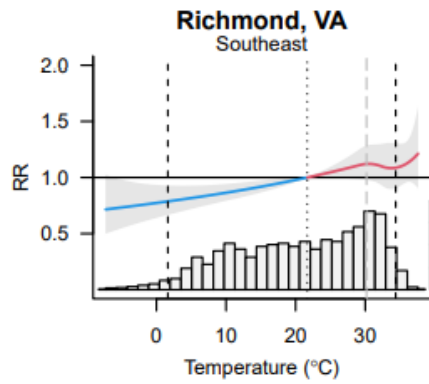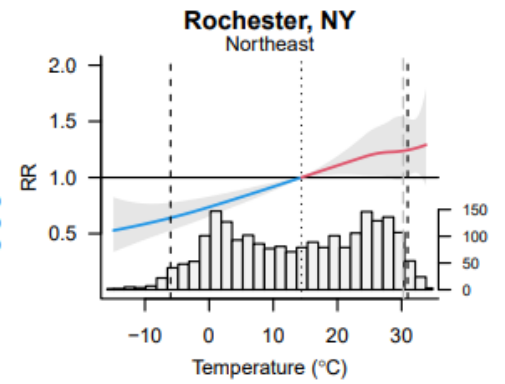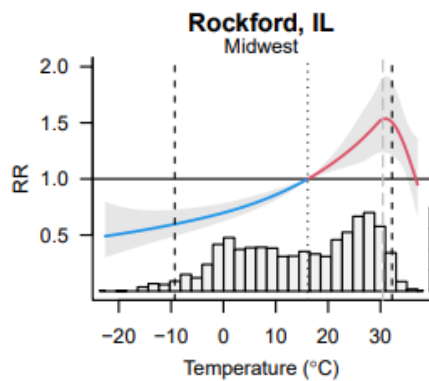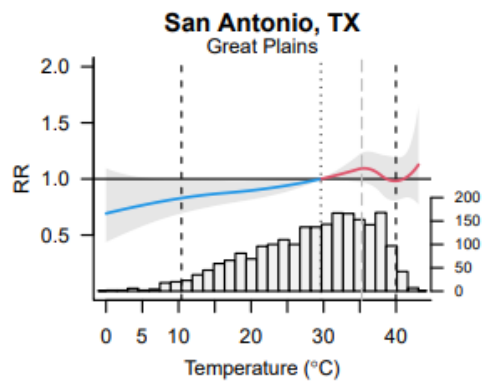

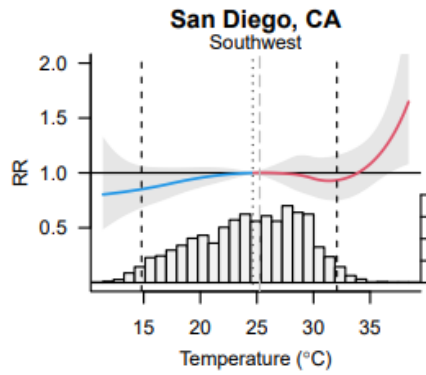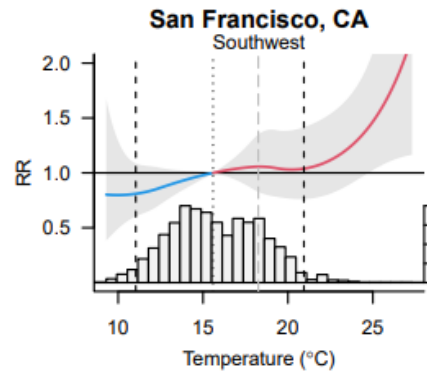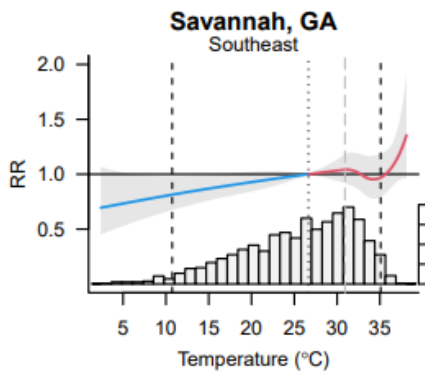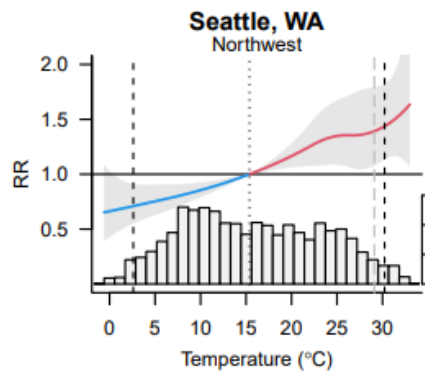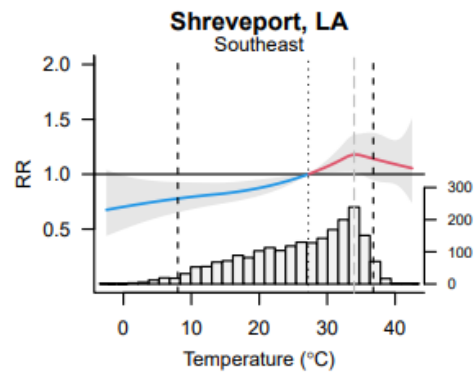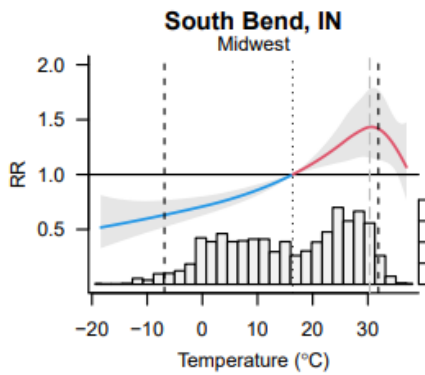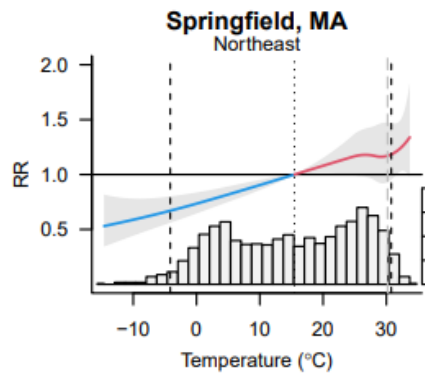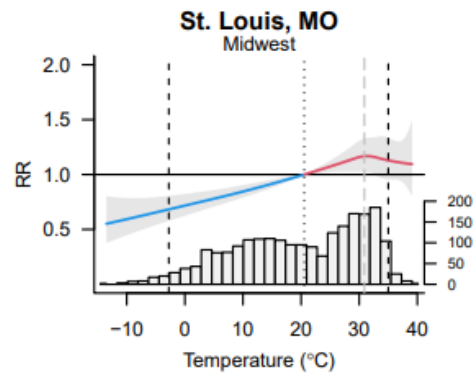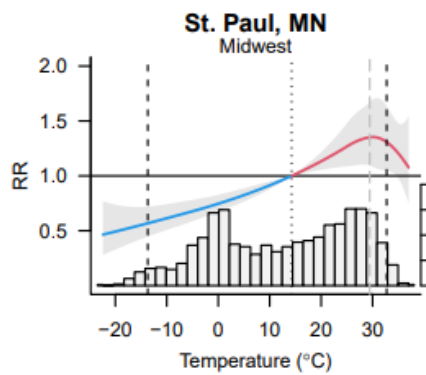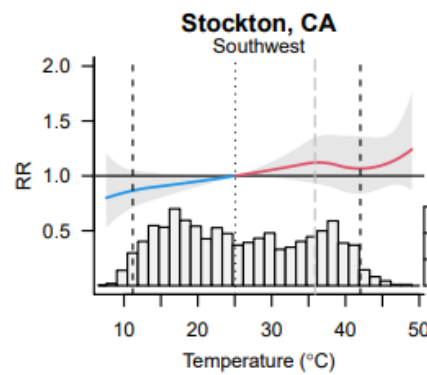

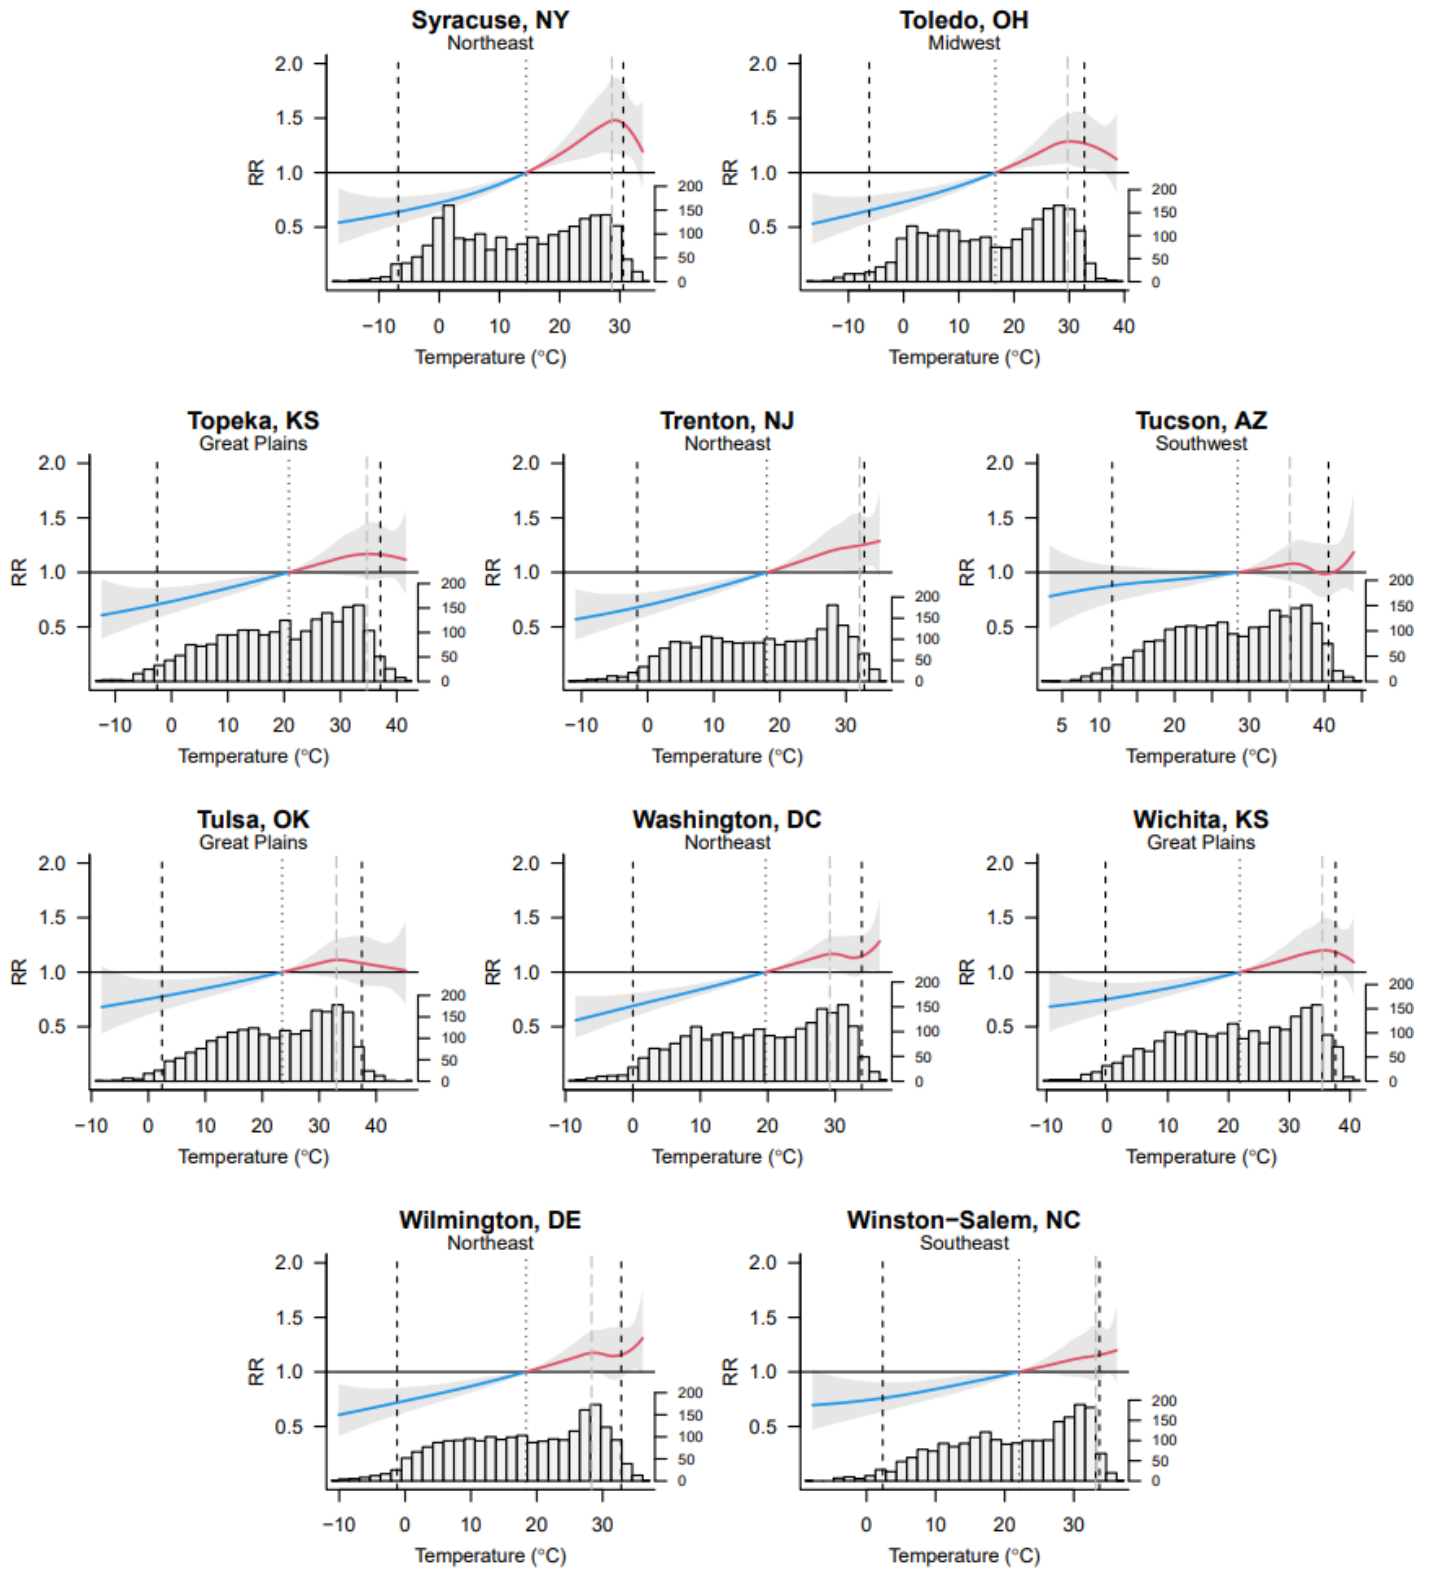

Supplement: jamanetwopen-e2247207-s001.pdf [file jamanetwopen-e2247207-s001.pdf]
