# Supplementary material for: Analysis of Daily Ambient Temperature and Firearm Violence in 100 US Cities
Source: PubMed Central journal article supplement (PMC9856408; doi:10.1001/jamanetworkopen.2022.47207), 2022-12-16
Supplement: jamanetwopen-e2247207-s002.pdf [file jamanetwopen-e2247207-s002.pdf]

## Data Sharing Statement

Lyons. Analysis of Daily Ambient Temperature and Firearm Violence in 100 US Cities. *JAMA Netw Open*. Published December 16, 2022. doi:10.1001/jamanetworkopen.2022.47207

### Data

**Data available:** Yes

**Data types:** Data (not involving human participants)

**How to access data:** Data is available upon request to [egause@bu.edu](mailto:egause@bu.edu).

**When available:** With publication

### Supporting Documents

**Document types:** Statistical/analytic code

**How to access documents:** We have uploaded our code to a publicly available GitHub repository found here: [https://github.com/2022\\_Lyons\\_JNO\\_Rcode](https://github.com/2022_Lyons_JNO_Rcode) with additional details in our Appendix.

**When available:** With publication

### Additional Information

**Who can access the data:** Data will be made available to researchers whose proposed use of the data has been approved.

**Types of analyses:** Any approved research project.

**Mechanisms of data availability:** After approval of a proposal and with a signed data access agreement.
